# Supplementary material for: Cost-effectiveness of noninvasive liver fibrosis tests for treatment decisions in patients with chronic hepatitis C
Source: PubMed Central journal article supplement — Hepatology. 2014 Jul 29;60(3):832–43. doi: 10.1002/hep.27296 (PMC4265295; doi:10.1002/hep.27296), 2014-07-29
Supplement: hep0060-0832-SD1.pdf [file hep0060-0832-SD1.pdf]

## Web Appendix

**Table 1. Search Strategy- Literature Review**

1. CT.ti,ab.
2. tomodensitometry.ti,ab.
3. PET.ti,ab.
4. MRI.ti,ab.
5. NMRI.ti,ab.
6. zeugmatogra\*.ti,ab.
7. ((computed or computeri?ed or magneti\* or proton or "Acoustic Radiation Force Impulse" or ARF) adj5 (tomogra\* or scan or scans or imaging)).ti,ab.
8. Tomography, X-Ray Computed/
9. Magnetic Resonance Imaging/
10. elastography.ti,ab.
11. elastographies.ti,ab.
12. sonoelastography.ti,ab.
13. sonoelastographies.ti,ab.
14. sono-elastography.ti,ab.
15. sono-elastographies.ti,ab.
16. elastogram.ti,ab.
17. elastograms.ti,ab.
18. vibroacoustography.ti,ab.
19. vibroacoustographies.ti,ab.
20. vibro-acoustography.ti,ab.
21. vibro-acoustographies.ti,ab.
22. fibroscan.ti,ab.
23. elastometry.ti,ab.
24. elasticity.ti,ab.
25. "liver stiffness".ti,ab.
26. elastogra\*.ti,ab.
27. echogra\*.ti,ab.
28. ultrason\*.ti,ab.
29. ultrasound.ti,ab.
30. Ultrasonography/
31. Elasticity Imaging Techniques/
32. Elasticity.ti,ab.
33. ((alanine\* or aspartate\* or glutamic\*) and (transaminase or aminotransferase\*)).ti,ab.
34. SGOT.ti,ab.
35. SGPT.ti,ab.
36. AST.ti,ab.
37. ALT.ti,ab.
38. Aspartate Aminotransferases/
39. Alanine Transaminase/
40. platelet.ti,ab.
41. platelets.ti,ab.
42. thrombocyte.ti,ab.
43. thrombocytes.ti,ab.
44. APRI.ti,ab.
45. Blood Platelets/
46. Biological Markers/
47. ELF.ti,ab.
48. "enhanced liver fibrosis".ti,ab.
49. Fibrotest.ti,ab.
50. Fibrosure.ti,ab.
51. Fibrometer.ti,ab.
52. FIB4.ti,ab.
53. FIB-4.ti,ab.
54. BARD.ti,ab.
55. Fibrospect.ti,ab.

56. Hepascore.ti,ab.
57. "Hyaluronic acid".ti,ab.
58. hyaluronate.ti,ab.
59. Hyaluronic Acid/
60. "Forns index".ti,ab.
61. laminin.ti,ab.
62. Laminin/
63. YKL-40.ti,ab.
64. "YKL 40".ti,ab.
65. "Type IV collagen".ti,ab.
66. Collagen Type IV/
67. "Procollagen III N-peptide".ti,ab.
68. "Lok index".ti,ab.
69. MP3.ti,ab.
70. MP-3.ti,ab.
71. "Fibrosis probability index".mp. or "sydney index".ti,ab.
72. FPI.ti,ab.
73. Fibroindex.ti,ab.
74. "Virahep-C index".ti,ab.
75. "Virahep C index".ti,ab.
76. "Goteborg University Cirrhosis Index".ti,ab.
77. GUCI.ti,ab.
78. SHASTA.ti,ab.
79. Glycocirrhorest.ti,ab.
80. Glycofibrotest.ti,ab.
81. BAAT.ti,ab.
82. "NAFLD fibrosis score".ti,ab.
83. Cytokeratin-18.ti,ab.
84. "Cytokeratin 18".ti,ab.
85. M30.ti,ab.
86. M-30.ti,ab.
87. "NASJH test".ti,ab.
88. "NAFIC score".ti,ab.
89. PGA.ti,ab.
90. "PGAA index".ti,ab.
91. "Bonancini score".ti,ab.
92. "Pohl score".ti,ab.
93. "Cirrhosis discriminant score".ti,ab.
94. "Age-platelet index".ti,ab.
95. TIMP-1.ti,ab.
96. "tissue inhibitory metalloprotease".ti,ab.
97. MBT.ti,ab.
98. "C-methacetin breath test".ti,ab.
99. "Phosphoproteomic biomarker".ti,ab.
100. "Phosphoproteomic biomarkers".ti,ab.
101. PICP.ti,ab.
102. PIIINP.ti,ab.
103. PON-I.ti,ab.
104. "paraoxonase I".ti,ab.
105. MFAP-4.ti,ab.
106. "MFAP 4".ti,ab.
107. MFAP4.ti,ab.
108. "microfibril associated glycoprotein 4".ti,ab.
109. or/1-9,27-30,33-39
110. limit 109 to yr="1988 -Current"
111. or/10-26,30-32,40-108
112. limit 111 to yr="2001 -Current"
113. 110 or 112
114. cirrhosis.ti,ab.
115. cirrhoses.ti,ab.

116. fibrosis.ti,ab.
117. fibroses.ti,ab.
118. "liver disease".ti,ab.
119. (hepatitis or hepatic).ti,ab.
120. steatohepatitis.ti,ab.
121. Liver Cirrhosis/
122. Fibrosis/
123. Liver Diseases/
124. Hepatitis/
125. or/114-124
126. 113 and 125
127. exp "sensitivity and specificity"/
128. "reproducibility of results"/
129. diagnos\*.ti. or diagnostic.ab.
130. di.fs.
131. sensitivit\*.ab.
132. specificit\*.ab.
133. (ROC or "receiver operat\*").ab.
134. Area under curve/
135. ("Area under curve" or AUC).ab.
136. (sROC or "optimal cut-off").ab.
137. (accura\* or ((gold\* or reference) adj2 standard)).ti,ab.
138. (likelihood adj3 (ratio\* or function\*)).ab.
139. ((true or false) adj3 (positive\* or negative\*)).ab.
140. ((positive\* or negative\* or false or true) adj3 (rate\* or predictive)).ti,ab.
141. or/127-140
142. 126 and 141
143. \*liver cirrhosis/di
144. \*hepatitis/
145. \*fibrosis/
146. (liver or hepatitis or hepatic or fibrosis).ab.
147. di.fs.
148. 146 and 147
149. or/143-145,148
150. 113 and 149
151. 113 and 149
152. 142 or 151

Search narrative: This search strategy has been kept deliberately very broad – utilizing only two main search concepts: index test/s (concept A) - lines 1-108 and the disease of interest (concept B)/location of disease of interest (concept B) – lines 110-120. A methodological filter (concept C) is included but does not act as a filter to all search results (it is used in parallel: ((A AND B AND C) OR (A AND B-focussed))).

Potential studies for inclusion were initially identified from published non-Cochrane reviews and background literature. This generated a reference set of 70 potential (and probable) studies for inclusion to use to test the search strategy detailed above. The strategy was designed without knowledge of the 70 potential studies or of the search strategies used to identify the 70 from their original publications. All 70 studies were identified by the above strategy.

The yield from the above strategy was high. However, due the large number of tests within the scope of the review, a large yield could not be avoided.

Validation string:

("19196449" or "18448567" or "16823833" or "15685546" or "19013661" or "18673426" or "18410556" or "18672413" or "16394849" or "16020491" or "17255218" or "18192914" or "17258346" or "17530363" or "18987556" or "19413672" or "17663420" or "18568136" or "18637064" or "18818788" or "18930329" or "18705692" or "19261000" or "21904476" or "17608672" or "18218676" or "19030204" or "19104699" or "18544945" or "19308312" or "18832522" or "18083083" or "12883497" or "20493576" or "20180868" or "19060630" or "19013661" or "18672413" or "19758273" or "19171202" or "18339075" or "18285716" or "18339592" or "19999223" or "18796094" or "18706734" or "18482283" or "18553008" or

"18692034" or "17156890" or "17321634" or "17634962" or "17914968" or "16970597" or "16538110" or "16487951" or "16863553" or "17032409" or "16118349" or "17032410" or "16737415" or "16620291" or "16825937" or "16268817" or "16109665" or "15894397" or "15915455" or "16284529" or "15122779" or "17393509" or "18390575" or "19291784").ui.

## EMBASE

1. exp \*Liver Cirrhosis/ or exp \*Liver Fibrosis/ or exp \*Liver Disease/ or exp \*Hepatitis/
2. (liver or hepatic).ti,ab.
3. exp \*Liver/
4. 3 or 2
5. (cirrhosis or cirrheses or fibrosis or fibroses or liver disease or hepatitis or steatohepatitis).ti,ab.
6. 4 and 5
7. 1 or 6
8. (CT or tomodensitometry or MRI or NMRI or zeugmatogra\*).ti,ab.
9. ((computed or computerised or computerized or CT or magneti\* or MR or NMR or proton) and (tomogra\* or scan or scans or imaging)).ti,ab.
10. exp \*computer assisted tomography/
11. exp \*nuclear magnetic resonance imaging/
12. (elastography or elastographies or sonoelastography or sonoelastographies or sono-elastography or sono-elastographies or elastogram or elastograms or vibroacoustography or vibroacoustographies or vibro-acoustography or vibro-acoustographies or fibroscan or elastometry or elasticity or liver stiffness or echogra\* or ultrason\* or ultrasound).ti,ab.
13. exp \*ultrasound/
14. exp \*elastography/
15. ((alanine\* or aspartate\* or glutamic\*) and (transaminase or aminotransferase\*)).ti,ab.
16. (platelet or platelets or thrombocyte or thrombocytes or APRI or ELF or enhanced liver fibrosis or Fibrotest or Fibrosure or Fibrometer or FIB4 or FIB-4 or BARD or Fibrospect or Hepascore or Hyaluronic acid or hyaluronate or Forns index or laminin or YKL-40 or YKL 40 or Type IV collagen or Procollagen III N-peptide or Lok index or MP3 or MP-3 or Fibrosis probability index or FPI or Fibroindex or Virahep-C index or Virahep C index or Goteborg University Cirrhosis Index or GUCI or SHASTA or Glycocirrhotes or Glycofibrotest or BAAT or NAFLD fibrosis score or Cytokeratin-18 or Cytokeratin 18 or M30 or M-30 or NASJH test or NAFIC score or PGA or PGAA index or Bonancini score or Pohl score or Cirrhosis discriminant score or Age-platelet index or TIMP-1 or tissue inhibitory metalloprotease or MBT or C-methacetin breath test or Phosphoproteomic biomarker or Phosphoproteomic biomarkers or PICP or PIIINP or PON-I or paraoxonase I or MFAP-4 or MFAP 4 or MFAP4 or microfibril associated glycoprotein 4).ti,ab.
17. (SGOT or SGPT or AST or ALT).ti,ab.
18. exp \*alanine aminotransferase/
19. exp \*aspartate aminotransferase/
20. exp \*thrombocyte/
21. exp \*biological marker/
22. (2001\* or 2002\* or 2003\* or 2004\* or 2005\* or 2006\* or 2007\* or 2008\* or 2009\* or 2010\* or 2011\* or 2012\*).em.
23. 12 or 14 or 16 or 20 or 21
24. 22 and 23
25. 8 or 9 or 10 or 11 or 13 or 15 or 17 or 18 or 19
26. limit 25 to yr="1988 -Current"
27. 24 or 26
28. 7 and 27

Science Citation Index expanded

Search: 1988 – April 2012

#1 TS=(cirrhosis OR cirrheses OR fibrosis OR fibroses or liver disease or hepatitis or steatohepatitis)

#2 TS=(liver or hepatic)

#3 TS=(CT OR tomodensitometry OR PET OR MRI OR NMRI OR zeugmatogra\*)

#4 TS=((Acoustic Radiation Force Impulse or ARFI OR computed OR computerised OR computerized OR CT OR magneti\* OR MR OR NMR OR proton) AND (tomogra\* OR scan OR scans OR imaging))

#5 TS=(elastography or elastographies or sonoelastography or sonoelastographies or sono-elastography or sono-elastographies or elastogram or elastograms or vibroacoustography or vibroacoustographies or vibro-acoustography or vibro-acoustographies or fibroscan or elastometry or elasticity or liver stiffness

OR echogra\* OR ultrason\* OR ultrasound)

#6 TS=( alanine\* OR aspartate\* OR glutamic\*) AND (transaminase OR aminotransferase\*)

#7 TS=(SGOT OR SGPT OR AST OR ALT OR platelet OR platelets OR thrombocyte OR thrombocytes OR APRI OR ELF OR enhanced liver fibrosis OR Fibrotest OR Fibrosure OR Fibrometer OR FIB4 OR FIB-4 OR BARD OR Fibrospect OR Hepascore OR Hyaluronic acid OR hyaluronate OR Forn's index OR laminin OR YKL-40 OR YKL 40 OR Type IV collagen OR Procollagen III N-peptide OR Lok index OR MP3 OR MP-3 OR Fibrosis probability index OR FPI OR Fibroindex OR Virahep-C index OR Virahep C index OR Goteborg University Cirrhosis Index OR GUCI OR SHASTA OR Glycocirrhotes OR Glycofibrotest OR BAAT OR NAFLD fibrosis score OR Cytokeratin-18 OR Cytokeratin 18 OR M30 OR M-30 OR NASJH test OR NAFIC score OR PGA OR PGAA index OR Bonancini score OR Pohl score OR Cirrhosis discriminant score OR Age-platelet index OR TIMP-1 OR tissue inhibitory metalloprotease OR MBT OR C-methacetin breath test OR Phosphoproteomic biomarker OR Phosphoproteomic biomarkers OR PICP OR PIIINP OR PON-I OR paraoxonase I OR MFAP-4 OR MFAP 4 OR MFAP4 OR microfibril associated glycoprotein 4)

#8 (#3 OR #4 OR #5 OR #6 OR #7)

#9 (#1 AND #2 AND #8)

**Figure 1– Flowchart of Selection of Studies for review**

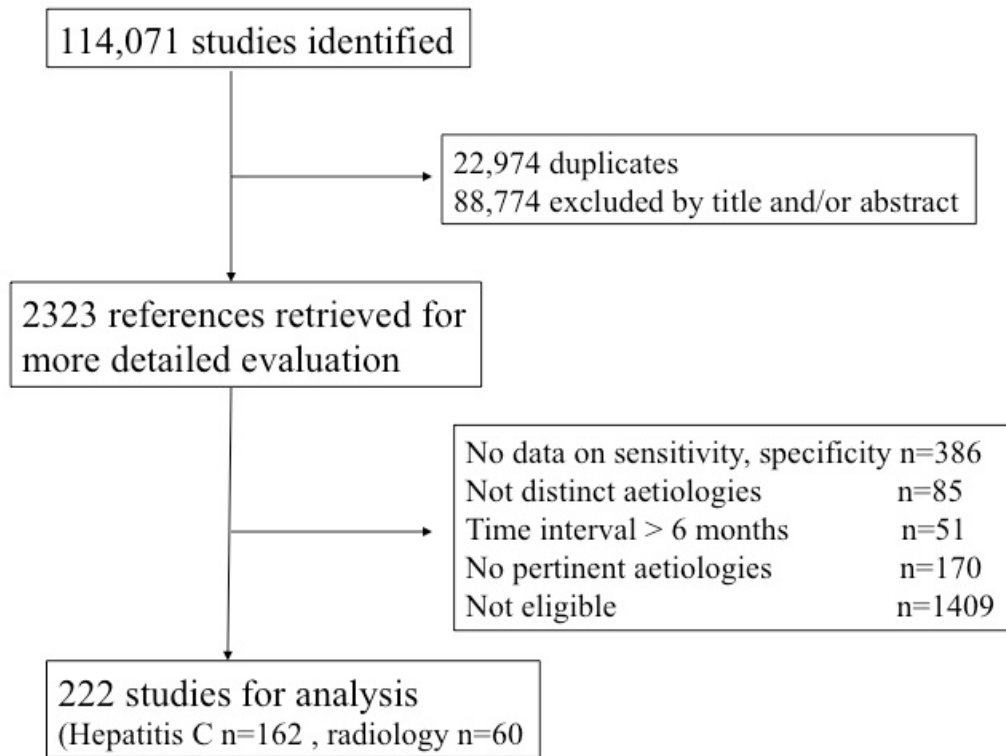

Table 2. Assessment of methodological quality using the QUADAS-2 tool

| <b>Quality assessed</b>               | <b>Description</b>                                                                       | <b>Choice</b>              | <b>Comment</b>                                                                                         |
|---------------------------------------|------------------------------------------------------------------------------------------|----------------------------|--------------------------------------------------------------------------------------------------------|
| <b>Domain 1:<br/>Patient sampling</b> | Was a consecutive or random sample of patients enrolled?                                 | Yes/No/Unclear             |                                                                                                        |
|                                       | Was a case-control design avoided?                                                       | Yes/No/Unclear             |                                                                                                        |
|                                       | Did the study avoid inappropriate exclusions?                                            | Yes/No/Unclear             | For example exclusion of patients with severe or low fibrosis, obese etc.                              |
| <b>Risk of bias</b>                   | <b>Could the selection of patients have introduced bias?</b>                             | Low risk/high risk/unclear | Summarizes previous questions: if any has no as answer then high risk, if any has unclear then unclear |
| <b>Concerns about applicability</b>   | <b>Are there concerns that the included patients and setting do not match the review</b> | High/Low concern/Unclear   | Tertiary centres, selected difficult cases                                                             |

|                                     |                                                                                                                 |                             |                                                                                                        |
|-------------------------------------|-----------------------------------------------------------------------------------------------------------------|-----------------------------|--------------------------------------------------------------------------------------------------------|
|                                     | <b>question?</b>                                                                                                |                             |                                                                                                        |
| <b>Domain 2: index test</b>         | Were the index test results interpreted without knowledge of the results of the reference standard?             | Yes/No/Unclear              | Relevant only in US, CT, MRI                                                                           |
|                                     | If a threshold was used, was it pre-specified?                                                                  | Yes/No/Unclear              |                                                                                                        |
| <b>Risk of bias</b>                 | <b>Could the conduct or interpretation of the index test have introduced bias?</b>                              | Low risk/ High risk/Unclear | Summarizes previous questions: if any has no as answer then high risk, if any has unclear then unclear |
| <b>Concerns about applicability</b> | <b>Are there concerns that the index test, its conduct, or interpretation differs from the review question?</b> | High/Low concern/Unclear    | Index test not conducted according to manufacturer recommendations                                     |
| <b>Domain 3: Reference standard</b> | Is the reference standard likely to correctly classify                                                          | Yes/No/Unclear              | Yes if biopsy length >15 mm and/or >6 portal tracts                                                    |



|                                     |                                                                                                                       |                                  |                                                                                                        |
|-------------------------------------|-----------------------------------------------------------------------------------------------------------------------|----------------------------------|--------------------------------------------------------------------------------------------------------|
|                                     | the target condition?                                                                                                 |                                  |                                                                                                        |
|                                     | Was the reference standard results interpreted without knowledge of the results of the index tests?                   | Yes/No/Unclear                   |                                                                                                        |
| <b>Risk of bias</b>                 | <b>Could the reference standard, its conduct, or its interpretation have introduced bias?</b>                         | Low risk/ High risk/Unclear      | Summarizes previous questions: if any has no as answer then high risk, if any has unclear then unclear |
| <b>Concerns about applicability</b> | <b>Are there concerns that the target condition as defined by the reference standard does not match the question?</b> | High Concern/Low concern/Unclear | Always low concern                                                                                     |
| <b>Domain 4: Flow and timing</b>    | Was there an appropriate interval                                                                                     | Yes/No/Unclear                   | Yes if interval between biopsy and                                                                     |

|                     |                                                       |                             |                                                                                                                                    |
|---------------------|-------------------------------------------------------|-----------------------------|------------------------------------------------------------------------------------------------------------------------------------|
|                     | between index test and reference standard?            |                             | index test < 3 months, no if interval >3 but < 6 months, excluded study if interval > 6 months                                     |
|                     | Did all patients receive the same reference standard? | Yes/No/Unclear              |                                                                                                                                    |
|                     | Were all patients included in the analysis?           | Yes/No/Unclear              | No if patients with uninterpretable results were not included in the analysis or if there were patients with indeterminate results |
| <b>Risk of bias</b> | <b>Could the patient flow have introduced bias?</b>   | Low risk/ High risk/Unclear | Summarizes previous questions: if any has no as answer then high risk, if any has unclear then unclear                             |

**Table 3 – Quality assessment of studies included in the meta-analysis for chronic hepatitis C. Quality assessment was done using the QUADAS-2 tool**

|                    | Domain 1: Patient sampling |                                 | Domain 2: Index test |                                    | Domain 3: Reference standard |                                    | Domain 4:<br>Flow and<br>timing |
|--------------------|----------------------------|---------------------------------|----------------------|------------------------------------|------------------------------|------------------------------------|---------------------------------|
| Study ID           | Risk of bias               | Concerns about<br>applicability | Risk of bias         | Concerns<br>about<br>applicability | Risk of bias                 | Concerns<br>about<br>applicability | Risk of bias                    |
| Adams 2005 (1)     | ✓                          | ✓                               | ✗                    | ✓                                  | ✗                            | ✓                                  | ✓                               |
| Ahmad 2011 (2)     | ?                          | ✓                               | ✓                    | ✓                                  | ?                            | ✓                                  | ✓                               |
| Al Mohri (3)       | ?                          | ?                               | ✓                    | ✓                                  | ?                            | ✓                                  | ✓                               |
| Anaparthi 2009 (4) | ✗                          | ✗                               | ✓                    | ✓                                  | ?                            | ✓                                  | ?                               |
| Arena 2008 (5)     | ✓                          | ✗                               | ✗                    | ✓                                  | ✓                            | ✓                                  | ✓                               |
| Beckebaum 2010 (6) | ✗                          | ✗                               | ✗                    | ✓                                  | ✗                            | ✓                                  | ✓                               |
| Bejarano 2009(7)   | ✓                          | ✓                               | ✗                    | ✓                                  | ?                            | ✓                                  | ✓                               |
| Berg 2004 (8)      | ?                          | ?                               | ?                    | ?                                  | ?                            | ✓                                  | ?                               |
| Borroni 2002 (9)   | ?                          | ?                               | ?                    | ?                                  | ?                            | ✓                                  | ?                               |

|                     |   |   |   |   |   |   |   |
|---------------------|---|---|---|---|---|---|---|
| Bourliere 2006 (10) | ✓ | ✗ | ✗ | ✓ | ✗ | ✓ | ✗ |
| Boursier 2009 (11)  | ✓ | ✓ | ✗ | ✓ | ✗ | ✓ | ✗ |
| Boursier 2012 (12)  | ✓ | ✓ | ✓ | ✗ | ✗ | ✓ | ✓ |
| Burton 2010 (13)    | ✗ | ✗ | ✓ | ✓ | ? | ✓ | ? |
| Cales 2010a (14)    | ✗ | ✗ | ✓ | ✓ | ? | ✓ | ✗ |
| Cales 2010b (15)    | ? | ? | ✗ | ✓ | ? | ✓ | ✓ |
| Calvaruso 2010 (16) | ✓ | ✓ | ✓ | ✓ | ✓ | ✓ | ✓ |
| Cardoso 2012 (17)   | ✓ | ✓ | ✓ | ✓ | ✗ | ✓ | ✗ |
| Carrion 2006 (18)   | ✓ | ✓ | ✗ | ✗ | ? | ✓ | ✓ |
| Carvalho 2008 (19)  | ✗ | ✗ | ✗ | ✓ | ✗ | ✓ | ✓ |
| Castera 2005 (20)   | ✓ | ✓ | ✗ | ✓ | ✗ | ✓ | ✓ |
| Castera 2007 (21)   | ? | ? | ✓ | ✓ | ? | ✓ | ? |
| Castera 2009 (22)   | ✓ | ✓ | ✓ | ✓ | ✗ | ✓ | ✓ |
| Ceriani 2001 (23)   | ? | ? | ✓ | ? | ? | ✓ | ? |
| Chen 2008 (24)      | ? | ? | ✗ | ✓ | ? | ✓ | ? |
| Cheung 2008 (25)    | ✗ | ✗ | ✓ | ✗ | ✗ | ✓ | ✓ |

|                        |   |   |   |   |   |   |   |
|------------------------|---|---|---|---|---|---|---|
| Cho 2011(26)           | ✓ | ✓ | ✓ | ✓ | ✗ | ✓ | ✓ |
| Christensen 2006 (27)  | ? | ✗ | ✗ | ✓ | ? | ✓ | ✗ |
| Chrysanthos 2006 (28)  | ✓ | ✓ | ✓ | ✓ | ✗ | ✓ | ✓ |
| Cobbold 2010 (29)      | ✓ | ✓ | ✗ | ✓ | ✗ | ✓ | ✗ |
| Colletta 2005 (30)     | ✗ | ✗ | ✓ | ? | ✗ | ✓ | ✗ |
| Corradi 2009 (31)      | ✗ | ✗ | ✓ | ✓ | ? | ✓ | ✓ |
| Crespo 2010 (32)       | ? | ? | ✗ | ✓ | ? | ✓ | ✓ |
| Cross 2010 (33)        | ✓ | ✓ | ✗ | ✗ | ✗ | ✓ | ✗ |
| da Silva 2008 (34)     | ? | ✗ | ✗ | ✓ | ? | ✓ | ✓ |
| Danila 2011 (35)       | ? | ? | ✗ | ? | ? | ✓ | ✓ |
| De Ledinghen 2006 (36) | ✓ | ✓ | ✗ | ✗ | ✗ | ✓ | ✓ |
| Degos 2010 (37)        | ✓ | ✓ | ✓ | ✓ | ? | ✓ | ✓ |
| Dinesen 2008 (38)      | ✗ | ✗ | ✗ | ✓ | ? | ✓ | ? |
| Esmat 2007 (39)        | ✓ | ✓ | ✗ | ✓ | ✗ | ✓ | ✗ |
| Fabris 2006 (40)       | ✗ | ✗ | ✓ | ✓ | ✗ | ✓ | ✓ |
| Fahmy 2011 (41)        | ✓ | ✓ | ? | ✓ | ✓ | ✓ | ✓ |

|                        |   |   |   |   |   |   |   |
|------------------------|---|---|---|---|---|---|---|
| Fontaine 2009 (42)     | ✘ | ✘ | ✘ | ✓ | ? | ✓ | ? |
| Fontana 2008 (43)      | ✘ | ✘ | ✘ | ✘ | ✓ | ✓ | ? |
| Fontanges 2008 (44)    | ✘ | ✘ | ✘ | ✘ | ✘ | ✓ | ✓ |
| Forestier 2010 (45)    | ✘ | ✘ | ✘ | ✘ | ? | ? | ✘ |
| Forns 2002 (46)        | ✘ | ✘ | ✘ | ✘ | ✓ | ✓ | ✓ |
| Fraquelli 2011 (47)    | ✘ | ✘ | ✘ | ✓ | ✓ | ✓ | ✘ |
| Fujii 2009 (48)        | ✘ | ✘ | ✓ | ✓ | ✓ | ✓ | ✓ |
| Fujimoto 2011 (49)     | ✘ | ✓ | ✘ | ✓ | ? | ✓ | ✓ |
| Gaia 2011 (50)         | ✘ | ✓ | ✓ | ✓ | ✓ | ✓ | ✘ |
| Ganne-Carrie 2006 (51) | ✓ | ✓ | ✘ | ✘ | ✘ | ✓ | ✓ |
| Gara 2011 (52)         | ✘ | ✘ | ✘ | ✓ | ? | ✓ | ✘ |
| Giannini 2006 (53)     | ✓ | ✓ | ✘ | ✓ | ? | ✓ | ✓ |
| Gobel 2006 (54)        | ✘ | ✘ | ✘ | ✓ | ? | ✓ | ✓ |
| Guechot 2010 (55)      | ✓ | ✓ | ✘ | ✓ | ✓ | ✓ | ✓ |
| Guechot 1996 (56)      | ✓ | ✓ | ✘ | ✘ | ? | ✓ | ✓ |
| Guzelbulut 2011 (57)   | ✓ | ✓ | ✘ | ✓ | ? | ✓ | ✓ |

|                         |   |   |   |   |   |   |   |
|-------------------------|---|---|---|---|---|---|---|
| Halfon 2006 (58)        | ✓ | ✓ | ✗ | ✓ | ✗ | ✓ | ✓ |
| Halfon 2005 (59)        | ✓ | ✓ | ✗ | ✓ | ✓ | ✓ | ✗ |
| Halfon 2007 (60)        | ✓ | ✓ | ✓ | ✓ | ✓ | ✓ | ✓ |
| Harada 2008 (61)        | ✗ | ✗ | ✗ | ✓ | ? | ✓ | ✗ |
| Hsieh 2012 (62)         | ✗ | ✗ | ✗ | ✓ | ? | ✓ | ✓ |
| Iacobellis 2005 (63)    | ✓ | ✓ | ✓ | ✓ | ✗ | ✓ | ✓ |
| Imbert-Bismut 2001 (64) | ✗ | ✓ | ✗ | ✓ | ✗ | ✓ | ✗ |
| Imperiale 2000 (65)     | ✓ | ✓ | ✓ | ✓ | ? | ✓ | ✗ |
| Islam 2005 (66)         | ✗ | ✗ | ✓ | ✓ | ✗ | ✓ | ✗ |
| Iushchuk 2005 (67)      | ? | ? | ? | ? | ? | ? | ? |
| Jazia 2009 (68)         | ✗ | ✗ | ✗ | ✓ | ? | ✓ | ✓ |
| Kalantari 2011 (69)     | ✓ | ✓ | ✗ | ✓ | ✗ | ✓ | ✓ |
| Kamphues 2010 (70)      | ✗ | ✗ | ✗ | ✓ | ✓ | ✓ | ✗ |
| Kandemir 2009 (71)      | ✗ | ✗ | ✗ | ✓ | ? | ✓ | ✓ |
| Kelleher 2005 (72)      | ✗ | ✓ | ✗ | ✓ | ✗ | ✓ | ✓ |
| Khan 2008 (73)          | ? | ✓ | ✗ | ✓ | ? | ✓ | ✓ |

|                   |   |   |   |   |   |   |   |
|-------------------|---|---|---|---|---|---|---|
| Kim 2011 (74)     | ✓ | ✓ | ✗ | ✓ | ✓ | ✓ | ✓ |
| Koda 2007 (75)    | ✓ | ✓ | ✗ | ✓ | ✗ | ✓ | ✓ |
| Koizumi 2011 (76) | ✓ | ✓ | ✗ | ✓ | ✗ | ✓ | ✓ |
| Lackner 2005 (77) | ✓ | ✓ | ✓ | ✓ | ✓ | ✓ | ✓ |
| Ladero 2010 (78)  | ✓ | ✓ | ✓ | ✓ | ✗ | ✓ | ✓ |
| Lee 2011 (79)     | ✓ | ✗ | ✗ | ✓ | ✗ | ✓ | ✓ |
| Leroy 2004 (80)   | ✓ | ✓ | ✗ | ✓ | ? | ✓ | ✓ |
| Leroy 2007 (81)   | ✓ | ✓ | ✓ | ✓ | ✗ | ✓ | ✓ |
| Leroy 2011 (82)   | ? | ? | ? | ✓ | ? | ✓ | ✓ |
| Lewin 2007 (83)   | ✓ | ✓ | ✗ | ✓ | ✗ | ✓ | ✓ |
| Lieber 2006 (84)  | ✗ | ✗ | ✓ | ✓ | ✗ | ✓ | ✗ |
| Liu 2006 (85)     | ✓ | ✓ | ✗ | ✓ | ? | ✓ | ✓ |
| Liu 2011 (86)     | ✓ | ✓ | ✗ | ✓ | ✓ | ✓ | ✓ |
| Liu 2007 (87)     | ✓ | ✓ | ✗ | ✓ | ? | ✓ | ✓ |
| Loko 2008 (88)    | ✓ | ✓ | ✓ | ✓ | ✗ | ✓ | ✓ |
| Lupsor 2008 (89)  | ✓ | ✓ | ✗ | ✓ | ✗ | ✓ | ✓ |



|                      |   |   |   |   |   |   |   |
|----------------------|---|---|---|---|---|---|---|
| Lupsor 2009 (90)     | ✓ | ✓ | ✗ | ✓ | ✗ | ✓ | ✓ |
| Macias 2006 (91)     | ✓ | ✓ | ✓ | ✓ | ✗ | ✓ | ✓ |
| Macias 2011 (92)     | ? | ? | ✓ | ✓ | ✗ | ✓ | ? |
| Martinez 2011 (93)   | ✓ | ✓ | ✗ | ✓ | ✗ | ✓ | ? |
| Morikawa 2011 (94)   | ? | ✓ | ✗ | ✓ | ? | ✓ | ✓ |
| Murawaki 2001 (95)   | ✗ | ✗ | ✗ | ✓ | ? | ✓ | ? |
| Myers 2002 (96)      | ? | ✓ | ✓ | ✓ | ✗ | ✓ | ✓ |
| Nitta 2009 (97)      | ✓ | ✓ | ✗ | ✓ | ? | ✓ | ✓ |
| Nojiri 2010 (98)     | ? | ✓ | ✗ | ✓ | ? | ✓ | ? |
| Nunes 2005 (99)      | ✓ | ✓ | ✗ | ✓ | ? | ✓ | ✗ |
| Obara 2008 (100)     | ✗ | ✓ | ✗ | ✓ | ✗ | ✓ | ✗ |
| Oliveira 2005 (101)  | ? | ? | ? | ✓ | ? | ✓ | ? |
| Orrlachio 2011 (102) | ✗ | ? | ✗ | ✓ | ✗ | ✓ | ✗ |
| Paggi 2008 (103)     | ✓ | ✓ | ✓ | ✓ | ? | ✓ | ✗ |
| Parise 2006 (104)    | ✓ | ✓ | ✗ | ✓ | ? | ✓ | ✓ |
| Park 2000 (105)      | ✗ | ✓ | ✓ | ✓ | ? | ✓ | ✗ |

|                      |   |   |   |   |   |   |   |
|----------------------|---|---|---|---|---|---|---|
| Parkes 2011 (106)    | ✘ | ✔ | ✘ | ✔ | ? | ✔ | ✘ |
| Patel 2009 (107)     | ? | ✔ | ✔ | ✔ | ✘ | ✔ | ? |
| Patel 2011 (108)     | ? | ✔ | ✘ | ✔ | ✘ | ✔ | ? |
| Pohl 2001 (109)      | ✘ | ✔ | ✔ | ✔ | ✘ | ✔ | ? |
| Poynard 2012 (110)   | ✘ | ✔ | ✔ | ✔ | ? | ✔ | ✘ |
| Prati 2011 (111)     | ? | ✔ | ? | ✔ | ? | ✔ | ✘ |
| Qiu 2004 (112)       | ✔ | ✔ | ✘ | ✔ | ? | ✔ | ✔ |
| Reedy 1998 (113)     | ✘ | ✔ | ✔ | ✔ | ? | ✔ | ✔ |
| Ronot 2010 (114)     | ✔ | ✔ | ✘ | ✔ | ✘ | ✔ | ✔ |
| Rossi 2003 (115)     | ✔ | ✔ | ✘ | ✔ | ? | ✔ | ? |
| Rossini 2010 (116)   | ? | ? | ✘ | ✔ | ? | ✔ | ? |
| Said 2010 (117)      | ✔ | ✔ | ✘ | ✔ | ✘ | ✔ | ? |
| Saitou 2005 (118)    | ? | ✘ | ✘ | ✔ | ? | ✔ | ? |
| Sanvisens 2009 (119) | ✔ | ✔ | ✘ | ✔ | ? | ✔ | ✘ |
| Schiavon 2007 (120)  | ✘ | ✔ | ✘ | ✔ | ✘ | ✔ | ✘ |
| Schiavon 2008 (121)  | ✘ | ✔ | ✘ | ✔ | ? | ✔ | ✘ |

|                       |   |   |   |   |   |   |   |
|-----------------------|---|---|---|---|---|---|---|
| Schneider 2006 (122)  | ? | ? | ✘ | ✓ | ? | ✓ | ? |
| Scneider 2005 (123)   | ✓ | ✓ | ✘ | ✓ | ? | ✓ | ✓ |
| Sebastiani 2012 (124) | ✓ | ✓ | ✓ | ✓ | ✘ | ✓ | ✓ |
| Sebastiani 2009 (125) | ✘ | ✓ | ✓ | ✓ | ✘ | ✓ | ✓ |
| Sebastiani 2006 (126) | ✓ | ✓ | ✘ | ✓ | ✓ | ✓ | ✓ |
| Sebastiani 2008 (127) | ✓ | ✓ | ✓ | ✓ | ✓ | ✓ | ✓ |
| Sene 2006 (128)       | ✘ | ✘ | ✘ | ✓ | ✘ | ✓ | ? |
| Sharabash 2009 (129)  | ✘ | ✓ | ? | ✓ | ? | ✓ | ? |
| Shastry 2007 (130)    | ? | ? | ✘ | ✓ | ? | ✓ | ✓ |
| Sheth 1997 (131)      | ✘ | ✓ | ✓ | ✓ | ? | ✓ | ✘ |
| Singal 2011 (132)     | ✓ | ✓ | ✓ | ✓ | ✘ | ✓ | ✘ |
| Sirli 2010 (133)      | ✘ | ✓ | ✓ | ✓ | ✓ | ✓ | ✓ |
| Snyder 2007 (134)     | ✓ | ✓ | ✘ | ✓ | ? | ✓ | ✓ |
| Snyder 2006 (135)     | ✘ | ✓ | ✘ | ✓ | ✘ | ✓ | ✘ |
| Sohn 2010 (136)       | ? | ✓ | ? | ✓ | ? | ✓ | ? |
| Sporea 2008 (137)     | ✓ | ✓ | ? | ✓ | ? | ✓ | ✘ |

|                           |   |   |   |   |   |   |   |
|---------------------------|---|---|---|---|---|---|---|
| Sporea 2010 (138)         | ✓ | ✓ | ✗ | ✓ | ? | ✓ | ✓ |
| Sporea 2011 (139)         | ? | ✓ | ? | ✓ | ? | ✓ | ✓ |
| Sporea 2011 (140)         | ? | ✓ | ? | ✓ | ? | ✓ | ? |
| Sterling 2006 (141)       | ✓ | ✗ | ✗ | ✓ | ? | ✓ | ✗ |
| Stibbe 2011 (142)         | ? | ✓ | ✓ | ✓ | ? | ✓ | ✗ |
| Sud 2009 (143)            | ✓ | ✓ | ✗ | ✓ | ? | ✓ | ✓ |
| Testa 2006 (144)          | ? | ✓ | ✗ | ✓ | ✗ | ✓ | ✗ |
| Thompson 2009 (145)       | ? | ✓ | ? | ✓ | ? | ✓ | ? |
| Thompson 2009 (146)       | ? | ✓ | ? | ✓ | ? | ✓ | ? |
| Thompson 2010 (147)       | ? | ✓ | ? | ✓ | ? | ✓ | ? |
| Toniutto 2007 (148)       | ✗ | ✗ | ✗ | ✓ | ? | ✓ | ✓ |
| Trang 2008 (149)          | ? | ✓ | ✗ | ✓ | ? | ✓ | ✗ |
| Trifan 2009 (150)         | ✓ | ✓ | ? | ✓ | ? | ✓ | ✓ |
| Trocme 2006 (151)         | ? | ✓ | ✗ | ✓ | ? | ✓ | ✗ |
| Vallet-Pichard 2007 (152) | ✓ | ✓ | ✓ | ✓ | ? | ✓ | ✓ |
| Tural 2007 (153)          | ✓ | ✗ | ✓ | ✓ | ? | ✓ | ✓ |

|                   |   |   |   |   |   |   |   |
|-------------------|---|---|---|---|---|---|---|
| Valva 2011 (154)  | ? | ✓ | ✓ | ✓ | ? | ✓ | ✓ |
| Varaut 2005 (155) | ✗ | ✗ | ✓ | ✓ | ✗ | ✓ | ✗ |
| Wai 2003 (156)    | ✓ | ✗ | ✗ | ✓ | ? | ✓ | ✗ |
| Westin 2008 (157) | ✓ | ✓ | ? | ✓ | ✗ | ✓ | ? |
| Wilson 2006 (158) | ✗ | ✗ | ✓ | ✓ | ✗ | ✓ | ? |
| Wong 1998 (159)   | ✓ | ✓ | ? | ✓ | ? | ✓ | ? |
| Zaman 2004 (160)  | ✓ | ✓ | ✓ | ✓ | ✓ | ✓ | ✓ |
| Zarski 2012 (161) | ✓ | ✗ | ✓ | ✓ | ✓ | ✓ | ✗ |
| Ziol 2005 (162)   | ✗ | ✓ | ✗ | ✓ | ✗ | ✓ | ✗ |

Red color ✗: High risk of bias

Green color ✓: Low risk of bias

Orange color ?: Unclear risk of bias

**Figure 2: Illustration of the reduction in the ‘Treat all’ ICER when the SVR rate for F0-1 patients is varied**

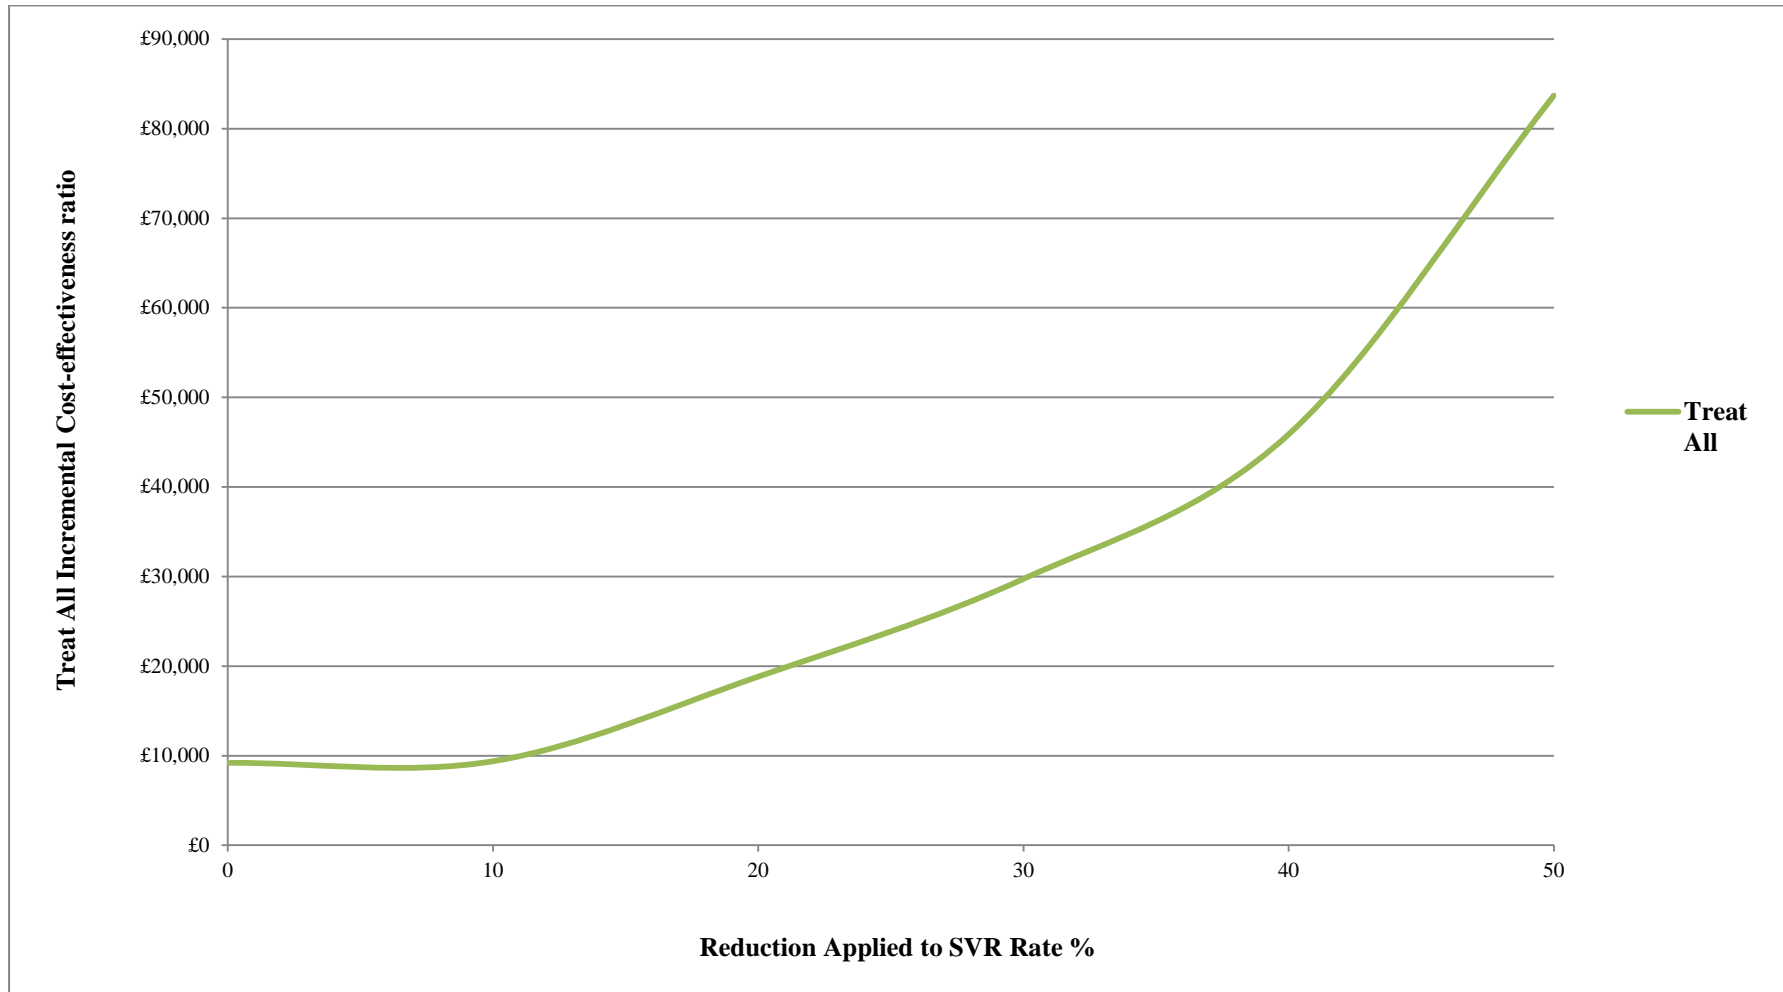

**Table 4: Unit Cost of NILTs and Liver Biopsy (2012-13)**

| Test                | Unit Cost £ | Source                                                                                                                                  |
|---------------------|-------------|-----------------------------------------------------------------------------------------------------------------------------------------|
| AAR                 | 0.90        | Personal Communication Royal Free (12.12.12)                                                                                            |
| Age-PLT Ratio (API) | 3.50        | Personal Communication Royal Free (12.12.12)                                                                                            |
| APRI                | 4.05        | Personal Communication Royal Free (12.12.12)                                                                                            |
| ARFI                | 51.00       | As Per personal communication Royal Free- costed at same cost as Fibroscan                                                              |
| AST-ALT ratio (AAR) | 0.90        | Personal Communication Royal Free (12.12.12)                                                                                            |
| Bordeaux            | 94.60       | Costed as combination Strategy (Fibrotest and Fibroscan)                                                                                |
| CDS                 | 7.19        | Personal Communication Royal Free 30.01.13                                                                                              |
| CEUS                | 113.70      | Department of Health Reference costs 2011-12 (US >20 minutes) plus contrast (SonoVue) cost- £48.70 (Royal Free personal communication ) |
| CT                  | 105.00      | Department of Health reference costs 2011-12 (CT with contrast pre and post scan) - Diagnostic Imaging Outpatients                      |
| DWMRI               | 199.00      | Cost as per MRI with contrast (as per personal communication Royal Free 04.12.12)                                                       |
| ELF                 | 108.00      | From personal communication-Wiktoria Jonasson, Royal Free (09.05.2012)- cost of ELF is £90 + VAT                                        |
| EOB-MRI             | 199.00      | Cost as per MRI with contrast (as per Royal Free)                                                                                       |
| Fib 4               | 4.40        | Personal Communication Royal Free (12.12.12)                                                                                            |

|                             |        |                                                                                                                                                                      |
|-----------------------------|--------|----------------------------------------------------------------------------------------------------------------------------------------------------------------------|
| Fibroindex                  | 48.00  | Personal Communication Royal Free (14.01.13)                                                                                                                         |
| Fibrometer                  | 44.00  | Personal communication - Anne Laure Gilles, BioLiveScale, (22.05.12)- quoted approximate price €50 (converted to UK cost using OECD indices)                         |
| Fibropaca-algorithm         | 509.89 | Tests: APRI, Forns, Liver biopsy, Fibrotest: proportion calculated using Sebastiani <i>et al.</i> (124)                                                              |
| FibroQ                      | 7.19   | Personal Communication Royal Free (30.01.13)                                                                                                                         |
| Fibroscan (TE)              | 51.00  | DH Reference Costs 2011/12 - Ultrasound less than 20 minutes (From Diagnostic Imaging, Outpatients (DIAGIM-OP) code RA23Z- As per advice from Royal Free             |
| Fibrosis Index (FI)         | 4.40   | Personal Communication Royal Free (12.12.12)                                                                                                                         |
| Fibrospect                  | 35.34  | Personal Communication Royal Free (14.01.13)                                                                                                                         |
| Fibrotest                   | 43.60  | Personal Communication (31.05.12)- Jean marie Castille-Directeur General (Biopredictive) - Converted to GBP Sterling (OECD PPP & Exchange rates data- rate 0.871929) |
| Fontana_F4                  | 31.50  | Personal Communication Royal Free (24.07.13)                                                                                                                         |
| Forns Index                 | 4.26   | Personal Communication Royal Free (22.01.13)                                                                                                                         |
| FPI high                    | 8.58   | Personal Communication Royal Free (22.01.13)                                                                                                                         |
| FPI low                     | 8.58   | Personal Communication Royal Free (22.01.13)                                                                                                                         |
| Fibrotest_Fibroscan (FT_TE) | 94.60  | Costed as Fibrotest & Fibroscan                                                                                                                                      |
| GUCI                        | 6.84   | Personal Communication Royal Free (22.01.13)                                                                                                                         |
| HA                          | 8.00   | Personal Communication Royal Free (22.01.13)                                                                                                                         |
| Hepascore                   | 16.24  | Personal communication Royal Free 22.01.13                                                                                                                           |



|                   |        |                                                                                                                                                      |
|-------------------|--------|------------------------------------------------------------------------------------------------------------------------------------------------------|
| HUI               | 4.60   | Personal Communication Royal Free (22.01.13)                                                                                                         |
| Kings             | 6.84   | Personal Communication Royal Free (22.01.13)                                                                                                         |
| Leroy-algorithm   | 724.74 | Tests: APRI, Liver biopsy, Fibrotest: proportion calculated using Sebastiani <i>et al.</i> (124)                                                     |
| Liver Biopsy      | 956.61 | Stevenson <i>et al.</i> (163)                                                                                                                        |
| Lok (HALTC)       | 7.19   | Personal Communication Royal Free (30.01.13)                                                                                                         |
| MP3               | 20.00  | Personal Communication Royal Free (30.01.13)                                                                                                         |
| MRE               | 199.00 | Department of Health Reference Costs 2011/12 - Diagnostic Imaging Outpatients, MRI one area pre and post contrast- (code RA23Z)                      |
| MRI               | 199.00 | Cost as per MRI with contrast (as per Royal Free)                                                                                                    |
| PGAA              | 9.07   | Royal Free Personal Communication (24.07.13)                                                                                                         |
| PIINP/MMP-1 index | 48.00  | Personal Communication Royal Free (14.01.13)                                                                                                         |
| PIINP             | 28.00  | Personal Communication Royal Free (12.12.12)                                                                                                         |
| PLT               | 3.50   | Personal Communication Royal Free (29.05.12)                                                                                                         |
| PLT_Spleen (SPRI) | 54.50  | Personal Communication Royal Free (04.12.12)                                                                                                         |
| Pohl              | 4.40   | Personal Communication Royal Free (30.01.13)                                                                                                         |
| SAFE              | 743.22 | Tests: APRI, Liver biopsy, Fibrotest: proportion calculated using Sebastiani <i>et al.</i> (124)                                                     |
| TE                | 51.00  | DH Reference Costs 2011/12 - Ultrasound less than 20 minutes (From Diagnostic Imaging, Outpatients (DIAGIM-OP) code RA23Z (as advised by Royal Free) |

|                  |       |                                                                                                                           |
|------------------|-------|---------------------------------------------------------------------------------------------------------------------------|
| Type IV Collagen | 20.00 | Personal communication Royal Free (30.01.13)                                                                              |
| Ultrasound (US)  | 51.00 | DH Reference Costs 2011/12 - Ultrasound less than 20 minutes (From Diagnostic Imaging, Outpatients (DIAGIM-OP) code RA23Z |
| US SAPI          | 65.00 | DH Reference Costs 2011/12- Ultrasound greater than 20 minutes                                                            |
| YKL-40           | 20.00 | Personal Communication Royal Free (08.02.13)                                                                              |

**Table 5: Base Case Analysis: (1<sup>st</sup> Stage of the analysis- comparison of NITs, liver biopsy, and the ‘treat all’ and ‘no treatment’ comparators)**

| Test Strategy                       | Costs £ | QALYs | Incremental Cost £ | Incremental QALY | ICER £               |
|-------------------------------------|---------|-------|--------------------|------------------|----------------------|
| Treat None                          | 54,878  | 12.45 | -                  | -                | Dominated            |
| Liver Biopsy                        | 48,710  | 14.03 | -                  | -                | Dominated            |
| Pohl                                | 47,727  | 14.04 | -                  | -                | Dominated            |
| Fibroindex ((high cut off) cut off) | 47,769  | 14.08 | -                  | -                | Dominated            |
| Forns Index (high cut off)          | 47,426  | 14.12 | -                  | -                | Dominated            |
| Hepascore (high cut off)            | 47,897  | 14.13 | -                  | -                | Dominated            |
| FPI (high cut off)                  | 47,335  | 14.14 | -                  | -                | Dominated            |
| APRI (high cut off)                 | 47,525  | 14.14 | -                  | -                | Dominated            |
| Fib 4                               | 47,900  | 14.15 | -                  | -                | Dominated            |
| Ultrasound                          | 48,090  | 14.17 | -                  | -                | Dominated            |
| ELF (high cut off)                  | 47,846  | 14.17 | -                  | -                | Dominated            |
| HA (high cut off)                   | 48,969  | 14.18 | -                  | -                | Dominated            |
| PLT                                 | 47,742  | 14.18 | -                  | -                | Dominated            |
| US SAPI (high cut off)              | 47,073  | 14.18 | -                  | -                | Dominated            |
| YKL 40 (high cut off)               | 48,536  | 14.19 | -                  | -                | Dominated            |
| FT (high cut off)                   | 47,896  | 14.22 | -                  | -                | Dominated            |
| PIIINP/MMP-1 index                  | 47,724  | 14.24 | -                  | -                | Dominated            |
| Kings (low cut off) Cut Off         | 47,743  | 14.24 | -                  | -                | Dominated            |
| Kings (high cut off)                | 47,963  | 14.25 | -                  | -                | Dominated            |
| Fibrosis Index                      | 47,423  | 14.25 | -                  | -                | Dominated            |
| ARFI                                | 47,126  | 14.25 | -                  | -                | Dominated            |
| GUCI                                | 47,791  | 14.25 | -                  | -                | Dominated            |
| AST-ALT                             | 48,629  | 14.26 | -                  | -                | Dominated            |
| AST-PLT                             | 47,847  | 14.26 | -                  | -                | Dominated            |
| MR                                  | 47,101  | 14.26 | -                  | -                | Dominated            |
| EOB-MRI                             | 48,054  | 14.26 | -                  | -                | Dominated            |
| MR elastography                     | 46,896  | 14.27 | -                  | -                | -                    |
| FIB-4 (high cut off)                | 48,158  | 14.27 | -                  | -                | Dominated            |
| CEUS                                | 47,215  | 14.28 | -                  | -                | Extendedly Dominated |
| APRI                                | 47,522  | 14.28 | -                  | -                | Extendedly Dominated |
| Fibroscan                           | 47,449  | 14.28 | -                  | -                | Extendedly Dominated |
| US SAPI                             | 47,763  | 14.29 | -                  | -                | Extendedly Dominated |
| DWMRI                               | 47,890  | 14.30 | -                  | -                | Dominated            |
| Fibrotest                           | 48,327  | 14.30 | -                  | -                | Dominated            |
| Hyaluronic Acid (HA)                | 48,013  | 14.30 | -                  | -                | Dominated            |

|                               |        |       |       |      |                      |
|-------------------------------|--------|-------|-------|------|----------------------|
| PIINP                         | 47,921 | 14.30 | -     | -    | Dominated            |
| Hepascore                     | 48,189 | 14.31 | -     | -    | Dominated            |
| Fibrometer                    | 48,104 | 14.32 | -     | -    | Dominated            |
| MP3                           | 48,008 | 14.33 | -     | -    | Dominated            |
| FibrospectII                  | 48,210 | 14.33 | -     | -    | Dominated            |
| Type IV collagen              | 47,888 | 14.34 | -     | -    | Dominated            |
| Hyaluronic Acid (low cut off) | 48,824 | 14.34 | -     | -    | Dominated            |
| Kings                         | 47,990 | 14.34 | -     | -    | Dominated            |
| ELF                           | 48,232 | 14.34 | -     | -    | Dominated            |
| CT                            | 48,727 | 14.35 | -     | -    | Dominated            |
| FibroQ                        | 48,372 | 14.35 | -     | -    | Dominated            |
| PLT Spleen                    | 47,803 | 14.35 | -     | -    | Extendedly Dominated |
| Forns Index                   | 50,555 | 14.37 | -     | -    | Dominated            |
| Lok                           | 49,077 | 14.38 | -     | -    | Dominated            |
| APRI (low cut off)            | 48,713 | 14.40 | -     | -    | Extendedly Dominated |
| CDS                           | 49,429 | 14.40 | -     | -    | Dominated            |
| Fibroindex (low cut off)      | 48,872 | 14.40 | -     | -    | Extendedly Dominated |
| ELF (low cut off)             | 49,041 | 14.44 | -     | -    | Extendedly Dominated |
| FPI (low cut off)             | 49,232 | 14.47 | -     | -    | Extendedly Dominated |
| FIB-4 (low cut off)           | 49,407 | 14.48 | -     | -    | Extendedly Dominated |
| Forns Index (low cut off)     | 49,571 | 14.49 | -     | -    | Dominated            |
| FT (low cut off)              | 49,534 | 14.49 | -     | -    | Extendedly Dominated |
| YKL 40 (low cut off)          | 50,156 | 14.50 | -     | -    | Dominated            |
| US SAPI (low cut off)         | 49,561 | 14.51 | -     | -    | Extendedly Dominated |
| Treat All                     | 51,241 | 14.73 | 4,345 | 0.46 | 9,351                |

**Table 6: Base Case Analysis: (2<sup>nd</sup> Stage of the analysis- comparison of sequential testing strategies, most cost-effective tests from 1<sup>st</sup> stage of the analysis, liver biopsy, published algorithms, NIT with a combined cut off diagnostic threshold and the ‘treat all’ and ‘no treatment’ comparators)**

| Test Strategy                       | Costs £ | QALYs | Incremental Cost £ | Incremental QALY | ICER £    |
|-------------------------------------|---------|-------|--------------------|------------------|-----------|
| Treat None                          | 54,878  | 12.45 | -                  | -                | Dominated |
| Liver Biopsy                        | 48,710  | 14.03 | -                  | -                | Dominated |
| (S3) Type IV Collagen & PLT Spleen  | 47,099  | 14.16 | -                  | -                | Dominated |
| (S3) Kings & PLT Spleen             | 47,139  | 14.16 | -                  | -                | Dominated |
| (S3) Kings & Type IV collagen       | 47,113  | 14.16 | -                  | -                | Dominated |
| Hepascore & Fibroscan               | 47,675  | 14.19 | -                  | -                | Dominated |
| (S3) FPI Low & Type IV Collagen     | 47,417  | 14.21 | -                  | -                | Dominated |
| (S3) FPI Low & PLT Spleen           | 47,461  | 14.21 | -                  | -                | Dominated |
| (S2) Kings & Type IV collagen       | 47,001  | 14.21 | -                  | -                | Dominated |
| (S2) Kings & PLT Spleen             | 46,999  | 14.21 | -                  | -                | Dominated |
| Fibroindex & Fibroscan              | 47,368  | 14.21 | -                  | -                | Dominated |
| (S3) FT Low & PLT Spleen            | 47,548  | 14.21 | -                  | -                | Dominated |
| (S4) Kings & Type IV collagen       | 46,978  | 14.21 | -                  | -                | Dominated |
| (S4) Kings & PLT Spleen             | 46,965  | 14.22 | -                  | -                | Dominated |
| (S3) Kings & FT Low                 | 47,579  | 14.22 | -                  | -                | Dominated |
| (S3) Type IV Collagen & US SAPI Low | 47,516  | 14.22 | -                  | -                | Dominated |
| (S4) Type IV Collagen & PLT Spleen  | 46,911  | 14.22 | -                  | -                | -         |
| (S2) Type IV Collagen & PLT Spleen  | 46,994  | 14.22 | -                  | -                | Dominated |
| (S3) Kings & US SAPI Low            | 47,606  | 14.22 | -                  | -                | Dominated |
| Leroy                               | 47,248  | 14.23 | -                  | -                | Dominated |
| (S4) FPI Low & Type IV Collagen     | 47,328  | 14.24 | -                  | -                | Dominated |
| (S2) FPI Low & Type IV Collagen     | 47,328  | 14.24 | -                  | -                | Dominated |
| (S2) FPI Low & PLT Spleen           | 47,359  | 14.24 | -                  | -                | Dominated |
| (S4) FPI Low & PLT Spleen           | 47,347  | 14.24 | -                  | -                | Dominated |
| (S2) FT Low & PLT                   | 47,519  | 14.24 | -                  | -                | Dominated |

|                                     |        |       |       |      |                      |  |
|-------------------------------------|--------|-------|-------|------|----------------------|--|
| Spleen                              |        |       |       |      |                      |  |
| (S4) FT Low & PLT Spleen            | 47,446 | 14.24 | -     | -    | Dominated            |  |
| (S4) Kings & FT Low                 | 47,521 | 14.25 | -     | -    | Dominated            |  |
| (S4) Type IV Collagen & US SAPI Low | 47,427 | 14.25 | -     | -    | Dominated            |  |
| Forns & TE                          | 47,233 | 14.25 | -     | -    | Dominated            |  |
| (S4) Kings & US SAPI Low            | 47,525 | 14.25 | -     | -    | Dominated            |  |
| (S1) Type IV Collagen               | 48,155 | 14.25 | -     | -    | Dominated            |  |
| (S1) PLT Spleen                     | 48,233 | 14.26 | -     | -    | Dominated            |  |
| (S1 ) Kings                         | 48,375 | 14.26 | -     | -    | Dominated            |  |
| Fibropaca                           | 47,545 | 14.26 | -     | -    | Dominated            |  |
| APRI & TE                           | 47,355 | 14.26 | -     | -    | Dominated            |  |
| (S2) Kings & FT Low                 | 47,467 | 14.26 | -     | -    | Dominated            |  |
| Fibrospect & TE                     | 46,954 | 14.27 | 43    | 0.05 | 928                  |  |
| (S2) Kings & US SAPI Low            | 47,466 | 14.27 | -     | -    | Dominated            |  |
| Bordeaux                            | 47,026 | 14.27 | -     | -    | Extendedly Dominated |  |
| ELF & TE                            | 47,533 | 14.28 | -     | -    | Dominated            |  |
| (S2) Type IV Collagen & US SAPI Low | 47,411 | 14.28 | -     | -    | Extendedly Dominated |  |
| HA & TE                             | 47,770 | 14.29 | -     | -    | Dominated            |  |
| YKL 40 & TE                         | 48,251 | 14.31 | -     | -    | Dominated            |  |
| FIB 4 & TE                          | 47,739 | 14.31 | -     | -    | Dominated            |  |
| FT & TE                             | 47,748 | 14.31 | -     | -    | Extendedly Dominated |  |
| SAFE                                | 47,985 | 14.33 | -     | -    | Dominated            |  |
| Type IV Collagen                    | 47,882 | 14.34 | -     | -    | Dominated            |  |
| Kings                               | 47,976 | 14.34 | -     | -    | Dominated            |  |
| PLT Spleen                          | 47,874 | 14.35 | -     | -    | Extendedly Dominated |  |
| (S1) FPI Low                        | 49,467 | 14.42 | -     | -    | Dominated            |  |
| (S1) FTL                            | 49,699 | 14.44 | -     | -    | Dominated            |  |
| (S1) US SAPI Low                    | 49,746 | 14.46 | -     | -    | Dominated            |  |
| FPI Low                             | 49,218 | 14.47 | -     | -    | Extendedly Dominated |  |
| FTL                                 | 49,536 | 14.49 | -     | -    | Dominated            |  |
| US SAPI Low                         | 49,549 | 14.51 | -     | -    | Extendedly Dominated |  |
| Treat All                           | 51,241 | 14.73 | 4,287 | 0.47 | 9,204                |  |

Table 7. Exploratory analysis for treatment with sofosbuvir, peg-IFN and ribavirin: comparison of NITs, liver biopsy, and the ‘treat all’ and ‘no treatment’ comparators

| Test                       | Costs £ | QALYs  | Incremental Cost £ | Incremental QALY | ICER £               |
|----------------------------|---------|--------|--------------------|------------------|----------------------|
| Treat None                 | 54,836  | 12.439 | -                  | -                | Dominated            |
| Liver Biopsy               | 53,087  | 14.508 | -                  | -                | Dominated            |
| Pohl score                 | 52,226  | 14.534 | -                  | -                | Dominated            |
| Fibroindex (high cut off)  | 52,245  | 14.595 | -                  | -                | Dominated            |
| Forns Index (high cut off) | 52,224  | 14.631 | -                  | -                | Dominated            |
| Hepascore (high cut off)   | 52,729  | 14.656 | -                  | -                | Dominated            |
| FPI (high cut off)         | 52,204  | 14.656 | -                  | -                | -                    |
| APRI (high cut off)        | 52,543  | 14.666 | -                  | -                | Dominated            |
| US                         | 53,754  | 14.688 | -                  | -                | Dominated            |
| Fib 4                      | 53,264  | 14.689 | -                  | -                | Dominated            |
| US SAPI (high cut off)     | 52,344  | 14.704 | -                  | -                | Extendedly Dominated |
| ELF (high cut off)         | 52,885  | 14.708 | -                  | -                | Dominated            |
| PLT                        | 52,885  | 14.724 | -                  | -                | Dominated            |
| YKL 40 (high cut off)      | 54,051  | 14.730 | -                  | -                | Dominated            |
| HA (high cut off)          | 54,630  | 14.732 | -                  | -                | Dominated            |
| FT (high cut off)          | 53,324  | 14.768 | -                  | -                | Dominated            |
| PIIINP/MMP-1 index         | 53,210  | 14.791 | -                  | -                | Dominated            |
| ARFI                       | 52,817  | 14.794 | -                  | -                | Dominated            |
| Kings Low Cut Off          | 53,456  | 14.795 | -                  | -                | Dominated            |
| Kings (high cut off)       | 53,814  | 14.803 | -                  | -                | Dominated            |
| MR                         | 52,809  | 14.803 | -                  | -                | Dominated            |
| Fibrosis Index             | 52,964  | 14.805 | -                  | -                | Dominated            |
| EOB-MRI                    | 54,137  | 14.807 | -                  | -                | Dominated            |
| AST-PLT                    | 53,674  | 14.811 | -                  | -                | Dominated            |
| AST-ALT                    | 54,799  | 14.811 | -                  | -                | Dominated            |
| MR elastography            | 52,529  | 14.814 | 325                | 0.16             | 2,057                |
| GUCI                       | 53,731  | 14.818 | -                  | -                | Dominated            |
| CEUS                       | 52,847  | 14.826 | -                  | -                | Extendedly Dominated |
| FIB-4 (high cut off)       | 54,208  | 14.827 | -                  | -                | Dominated            |
| Fibroscan                  | 53,470  | 14.830 | -                  | -                | Dominated            |
| APRI                       | 53,305  | 14.838 | -                  | -                | Extendedly Dominated |

|                           |        |        |       |      |                      |
|---------------------------|--------|--------|-------|------|----------------------|
| US SAPI                   | 53,947 | 14.841 | -     | -    | Dominated            |
| DWMRI                     | 54,148 | 14.857 | -     | -    | Dominated            |
| Fibrotest                 | 54,498 | 14.873 | -     | -    | Dominated            |
| HA                        | 54,050 | 14.873 | -     | -    | Dominated            |
| PIINP                     | 53,930 | 14.876 | -     | -    | Extendedly Dominated |
| Hepascore                 | 54,352 | 14.883 | -     | -    | Dominated            |
| Fibrometer                | 54,315 | 14.898 | -     | -    | Dominated            |
| MP3                       | 54,230 | 14.908 | -     | -    | Dominated            |
| FibrospectII              | 54,538 | 14.910 | -     | -    | Dominated            |
| PLT Spleen                | 54,356 | 14.911 | -     | -    | Dominated            |
| Type IV collagen          | 54,144 | 14.920 | 1,615 | 0.11 | 15,286               |
| CT                        | 55,641 | 14.922 | -     | -    | Dominated            |
| Kings                     | 54,410 | 14.925 | -     | -    | Extendedly Dominated |
| HA(low cut off)           | 55,448 | 14.925 | -     | -    | Extendedly Dominated |
| FibroQ                    | 54,977 | 14.929 | -     | -    | Dominated            |
| ELF                       | 54,630 | 14.932 | -     | -    | Extendedly Dominated |
| Forns Index               | 58,351 | 14.956 | -     | -    | Dominated            |
| Lok                       | 56,139 | 14.960 | -     | -    | Dominated            |
| APRI (low cut off)        | 55,837 | 14.995 | -     | -    | Dominated            |
| CDS                       | 56,871 | 15.000 | -     | -    | Dominated            |
| Fibroindex (low cut off)  | 55,934 | 15.013 | -     | -    | Dominated            |
| ELF (low cut off)         | 56,424 | 15.051 | -     | -    | Extendedly Dominated |
| FPI (low cut off)         | 57,019 | 15.091 | -     | -    | Extendedly Dominated |
| FIB-4 (low cut off)       | 57,413 | 15.105 | -     | -    | Dominated            |
| Forns Index (low cut off) | 57,600 | 15.112 | -     | -    | Dominated            |
| FT (low cut off)          | 57,520 | 15.118 | -     | -    | Extendedly Dominated |
| US SAPI (low cut off)     | 57,828 | 15.134 | -     | -    | Extendedly Dominated |
| YKL 40 (low cut off)      | 58,494 | 15.137 | -     | -    | Extendedly Dominated |
| Treat All                 | 61,745 | 15.394 | 7,600 | 0.47 | 16,028               |



## References

1. Adams LA, Bulsara M, Rossi E, DeBoer B, Speers D, George J, Kench J, et al. Hepascore: An accurate validated predictor of liver fibrosis in chronic hepatitis C infection. *Clinical Chemistry* 2005;51:1867-1873.
2. Ahmad W, Ijaz B, Javed FT, Gull S, Kausar H, Sarwar MT, Asad S, et al. A comparison of four fibrosis indexes in chronic HCV: development of new fibrosis-cirrhosis index (FCI). *BMC Gastroenterology* 2011;11:44.
3. Al-Mohri H, Cooper C, Murphy T, Klein MB. Validation of a simple model for predicting liver fibrosis in HIV/hepatitis C virus-coinfected patients. *HIV Medicine* 2005;6:375-378.
4. Anaparthi R, Guturu P, Snyder N, Sood G. Diagnostic utility of APRI for staging of liver disease in hepatitis C patients with ESRD on hemodialysis. *Gastroenterology* 2009;1):A833-A834.
5. Arena U, Vizzutti F, Abraldes JG, Corti G, Stasi C, Moscarella S, Milani S, et al. Reliability of transient elastography for the diagnosis of advanced fibrosis in chronic hepatitis C. *Gut* 2008;57:1288-1293.
6. Beckebaum S, Iacob S, Klein CG, Dechene A, Varghese J, Baba HA, Sotiropoulos GC, et al. Assessment of allograft fibrosis by transient elastography and noninvasive biomarker scoring systems in liver transplant patients. *Transplantation* 2010;89:983-993.
7. Bejarano G, Vergara M, Dalmau B, Puig J, Bella MR, Suarez D, Calvet X. Prospective evaluation of liver fibrosis in chronic viral hepatitis C infection using the Sabadell NIHCED (Non-Invasive Hepatitis-C-Related Cirrhosis Early Detection) index. *Revista Espanola de Enfermedades Digestivas* 2009;101:325-335.

8. Berg T, Sarrazin C, Hinrichsen H, Buggisch P, Gerlach T, Zachoval R, Zeuzem S. Does noninvasive staging of fibrosis challenge liver biopsy as a gold standard in chronic hepatitis C? *Hepatology* 2004;39:1456-1457; author reply 1457-1458.
9. Borroni G, Ceriani R, Tommasini MA, Maltempo C, Feline C, Contu L, Cazzaniga M. Platelet count: A simple marker of liver cirrhosis in chronic hepatitis C (CHC) infection. *Journal of Hepatology* 2002;36:47-47.
10. Bourliere M, Penaranda G, Renou C, Botta-Fridlund D, Tran A, Portal I, Lecomte L, et al. Validation and comparison of indexes for fibrosis and cirrhosis prediction in chronic hepatitis C patients: Proposal for a pragmatic approach classification without liver biopsies. *Journal of Viral Hepatitis* 2006;13:659-670.
11. Boursier J, Bacq Y, Halfon P, Leroy V, De Ledinghen V, De Muret A, Bourliere M, et al. Improved diagnostic accuracy of blood tests for severe fibrosis and cirrhosis in chronic hepatitis C. *European Journal of Gastroenterology and Hepatology* 2009;21:28-38.
12. Boursier J, de Ledinghen V, Zarski J-P, Fouchard-Hubert I, Gallois Y, Oberti F, Cales P, et al. Comparison of eight diagnostic algorithms for liver fibrosis in hepatitis C: new algorithms are more precise and entirely noninvasive. *Hepatology* 2012;55:58-67.
13. Burton MJ, Pham H, Sunesara I, McGloster N, Oliver N, McGuire BM. Performance of the APRI score in African Americans with chronic hepatitis C. *Hepatology* 2010;52:1236A-1237A.
14. Cales P, Boursier J, Bertrais S, Oberti F, Gallois Y, Fouchard-Hubert I, Dib N, et al. Optimization and robustness of blood tests for liver fibrosis and cirrhosis. *Clinical Biochemistry* 2010;43:1315-1322.

15. Cales P, Halfon P, Batisse D, Carrat F, Perre P, Penaranda G, Guyader D, et al. Comparison of liver fibrosis blood tests developed for HCV with new specific tests in HIV/HCV co-infection. *Journal of Hepatology* 2010;52:S405.
16. Calvaruso V, Camma C, Di Marco V, Maimone S, Bronte F, Enea M, Dardanoni V, et al. Fibrosis staging in chronic hepatitis C: Analysis of discordance between transient elastography and liver biopsy. *Journal of Viral Hepatitis* 2010;17:469-474.
17. Cardoso A-C, Carvalho-Filho RJ, Stern C, Dipumpo A, Giuily N, Ripault M-P, Asselah T, et al. Direct comparison of diagnostic performance of transient elastography in patients with chronic hepatitis B and chronic hepatitis C. *Liver International* 2012;32:612-621.
18. Carrion JA, Navasa M, Bosch J, Bruguera M, Gilibert R, Forns X. Transient elastography for diagnosis of advanced fibrosis and portal hypertension in patients with hepatitis C recurrence after liver transplantation. *Liver Transplantation* 2006;12:1791-1798.
19. Carvalho-filho RJ, Schiavon LL, Narciso-schiavon JL, Sampaio JP, Lanzoni VP, Ferraz MLG, Silva AEB. Optimized cutoffs improve performance of the aspartate aminotransferase to platelet ratio index for predicting significant liver fibrosis in human immunodeficiency virus/hepatitis C virus co-infection. *Liver International* 2008;28:486-493.
20. Castera L, Vergniol J, Foucher J, Le Bail B, Chanteloup E, Haaser M, Darriet M, et al. Prospective comparison of transient elastography, Fibrotest, APRI, and liver biopsy for the assessment of fibrosis in chronic hepatitis C. *Gastroenterology* 2005;128:343-350.

21. Castera L, Loko MA, Dabis F, Le Bail B, Winnock M, Coureau G, Neau D. Validation of simple indexes (FIB-4, APRI, forns index) and platelet count for non invasive prediction of liver fibrosis in HIV-HCV coinfecting French patients. *Hepatology* 2007;46:841A-841A.
22. Castera L, Bail BL, Roudot-Thoraval F, Bernard PH, Foucher J, Merrouche W, Couzigou P, et al. Early detection in routine clinical practice of cirrhosis and oesophageal varices in chronic hepatitis C: Comparison of transient elastography (FibroScan) with standard laboratory tests and non-invasive scores. *Journal of Hepatology* 2009;50:59-68.
23. Ceriani R, Borroni G, Tommasini MA, Maltempo C, Felling C, Contu L, Cazzaniga M. Platelet count and AST/ALT ratio can predict liver cirrhosis in chronic HCV infection. *Journal of Hepatology* 2001;34:71-71.
24. Chen CH, Lin ST, Yang CC, Yeh YH, Kuo CL, Nien CK. The accuracy of sonography in predicting steatosis and fibrosis in chronic hepatitis C. *Digestive Diseases and Sciences* 2008;53:1699-1706.
25. Cheung RC, Currie S, Shen H, Bini EJ, Ho SB, Anand BS, Hu K-Q, et al. Can we predict the degree of fibrosis in chronic hepatitis C patients using routine blood tests in our daily practice? *Journal of Clinical Gastroenterology* 2008;42:827-834.
26. Cho HJ, Seo YS, Lee KG, Hyun JJ, An H, Keum B, Kim JH, et al. Serum aminotransferase levels instead of etiology affects the accuracy of transient elastography in chronic viral hepatitis patients. *Journal of Gastroenterology and Hepatology* 2011;26:492-500.
27. Christensen C, Bruden D, Livingston S, Deubner H, Homan C, Smith K, Oh E, et al. Diagnostic accuracy of a fibrosis serum panel (FIBROSpect II) compared

with Knodell and Ishak liver biopsy scores in chronic hepatitis C patients. *Journal of Viral Hepatitis* 2006;13:652-658.

28. Chrysanthos NV, Papatheodoridis GV, Savvas S, Kafiri G, Petraki K, Manesis EK, Archimandritis AJ. Aspartate aminotransferase to platelet ratio index for fibrosis evaluation in chronic viral hepatitis. *European Journal of Gastroenterology and Hepatology* 2006;18:389-396.

29. Cobbold JFL, Crossey MME, Colman P, Goldin RD, Murphy PS, Patel N, Fitzpatrick J, et al. Optimal combinations of ultrasound-based and serum markers of disease severity in patients with chronic hepatitis C. *Journal of Viral Hepatitis* 2010;17:537-545.

30. Colletta C, Smirne C, Fabris C, Toniutto P, Rapetti R, Minisini R, Pirisi M. Value of two noninvasive methods to detect progression of fibrosis among HCV carriers with normal aminotransferases. *Hepatology* 2005;42:838-845.

31. Corradi F, Piscaglia F, Flori S, D'Errico-Grigioni A, Vasuri F, Tame MR, Andreone P, et al. Assessment of liver fibrosis in transplant recipients with recurrent HCV infection: Usefulness of transient elastography. *Digestive and Liver Disease* 2009;41:217-225.

32. Crespo SM, Bridges MD, Keaveny AP, Nakhleh RE, McPhail A, Pungpapong S. Magnetic resonance elastography is superior to the HULF index and APRI in evaluating fibrosis due to recurrent HCV after liver transplantation. *Hepatology* 2010;52:843A-844A.

33. Cross TJS, Calvaruso V, Maimone S, Carey I, Chang TP, Pleguezuelo M, Manousou P, et al. Prospective comparison of Fibroscan, King's score and liver biopsy for the assessment of cirrhosis in chronic hepatitis C infection. *Journal of Viral Hepatitis* 2010;17:546-554.

34. da Silva Jr RG, Fakhouri R, do Nascimento TVB, Santos IM, Barbosa LMM. Aspartate aminotransferase-to-platelet ratio index for fibrosis and cirrhosis prediction in chronic hepatitis C patients. *Brazilian Journal of Infectious Diseases* 2008;12:15-19.
35. Danila M, Sporea I, Sirli R, Bota S, Braticevici CF, Petrisor A, Popescu A. Acoustic radiation force impulse elastography (ARFI) for predicting the severity of fibrosis in patients with chronic HCV hepatitis - A bicentric Romanian study. *Gastroenterology* 2011;1):S968.
36. de Ledinghen V, Douvin C, Kettaneh A, Ziol M, Roulot D, Marcellin P, Dhumeaux D, et al. Diagnosis of hepatic fibrosis and cirrhosis by transient elastography in HIV/hepatitis C virus-coinfected patients. *Journal of acquired immune deficiency syndromes (1999)* 2006;41:175-179.
37. Degos F, Perez P, Roche B, Mahmoudi A, Asselineau J, Voitot H, Bedossa P. Diagnostic accuracy of FibroScan and comparison to liver fibrosis biomarkers in chronic viral hepatitis: A multicenter prospective study (the FIBROSTIC study). *Journal of Hepatology* 2010;53:1013-1021.
38. Dinesen L, Caspary WF, Chapman RW, Dietrich CF, Sarrazin C, Braden B. C-13-methacetin-breath test compared to also noninvasive biochemical blood tests in predicting hepatic fibrosis and cirrhosis in chronic hepatitis C. *Digestive and Liver Disease* 2008;40:743-748.
39. Esmat G, Metwally M, Zalata KR, Gadalla S, Abdel-Hamid M, Abouzied A, Shaheen AA, et al. Evaluation of serum biomarkers of fibrosis and injury in Egyptian patients with chronic hepatitis C. *Journal of Hepatology* 2007;46:620-627.
40. Fabris C, Smirne C, Toniutto P, Colletta C, Rapetti R, Minisini R, Falletti E, et al. Assessment of liver fibrosis progression in patients with chronic hepatitis C and

normal alanine aminotransferase values: The role of AST to the platelet ratio index. *Clinical Biochemistry* 2006;39:339-343.

41. Fahmy MI, Badran HM. Comparison of transient elastography to Doppler indices in prediction of hepatitis C induced liver fibrosis and cirrhosis. *Egyptian Journal of Radiology and Nuclear Medicine* 2011;42:111-117.

42. Fontaine H, Nalpas B, Vallet-Pichard A, Mallet V, Pol S. Low diagnosis accuracy of fibrotest and Fib-4 in HCV-infected hemodialysis and kidney recipients. *Hepatology* 2009;50:1064A.

43. Fontana RJ, Goodman ZD, Dienstag JL, Bonkovsky HL, Naishadham D, Sterling RK, Su GL, et al. Relationship of serum fibrosis markers with liver fibrosis stage and collagen content in patients with advanced chronic hepatitis C. *Hepatology* 2008;47:789-798.

44. Fontanges T, Bailly F, Trepo E, Chevallier M, Maynard-Muet M, Nalet B, Beorchia S, et al. Discordance between biochemical markers of liver activity and fibrosis (Actitest-Fibrotest) and liver biopsy in patients with chronic hepatitis C. *Gastroenterologie clinique et biologique* 2008;32:858-865.

45. Forestier J, Dumortier J, Guillaud O, Ecochard M, Roman S, Boillot O, Lutringer D, et al. Noninvasive diagnosis and prognosis of liver cirrhosis: a comparison of biological scores, elastometry, and metabolic liver function tests. *European journal of gastroenterology & hepatology* 2010;22:532-540.

46. Forn X, Ampurdanes S, Llovet JM, Aponte J, Quinto L, Martinez-Bauer E, Bruguera M, et al. Identification of chronic hepatitis C patients without hepatic fibrosis by a simple predictive model. *Hepatology* 2002;36:986-992.

47. Fraquelli M, Rigamonti C, Casazza G, Donato MF, Ronchi G, Conte D, Rumi M, et al. Etiology-related determinants of liver stiffness values in chronic viral hepatitis B or C. *Journal of Hepatology* 2011;54:621-628.
48. Fujii H, Enomoto M, Fukushima W, Ohfuji S, Mori M, Kobayashi S, Iwai S, et al. Noninvasive laboratory tests proposed for predicting cirrhosis in patients with chronic hepatitis C are also useful in patients with non-alcoholic steatohepatitis. *Journal of Gastroenterology* 2009;44:608-614.
49. Fujimoto K, Tonan T, Azuma S, Kage M, Nakashima O, Johkoh T, Hayabuchi N, et al. Evaluation of the mean and entropy of apparent diffusion coefficient values in chronic hepatitis C: Correlation with pathologic fibrosis stage and inflammatory activity grade. *Radiology* 2011;258:739-748.
50. Gaia S, Carezzi S, Barilli AL, Bugianesi E, Smedile A, Brunello F, Marzano A, et al. Reliability of transient elastography for the detection of fibrosis in Non-Alcoholic Fatty Liver Disease and chronic viral hepatitis. *Journal of Hepatology* 2011;54:64-71.
51. Ganne-Carrie N, Ziol M, De Ledinghen V, Douvin C, Marcellin P, Castera L, Dhumeaux D, et al. Accuracy of liver stiffness measurement for the diagnosis of cirrhosis in patients with chronic liver diseases. *Hepatology* 2006;44:1511-1517.
52. Gara N, Kleiner DE, Zhao X, Koh C, Rotman Y, Heller T, Abdalla AA, et al. Performance of transient elastography and APRI for prediction of advanced liver disease in a north American population with chronic hepatitis C. *Hepatology* 2011;54:570A.
53. Giannini EG, Zaman A, Ceppa P, Mastracci L, Risso D, Testa R. A simple approach to noninvasively identifying significant fibrosis in chronic hepatitis C patients in clinical practice. *Journal of Clinical Gastroenterology* 2006;40:521-527.



54. Gobel T, Vordenwulbecke S, Hauck K, Fey H, Haussinger D, Erhardt A. New multi protein patterns differentiative liver fibrosis stages and hepatocellular carcinoma in chronic hepatitis C serum samples. *World Journal of Gastroenterology* 2006;12:7604-7612.
55. Guechot J, Lasnier E, Sturm N, Paris A, Zarski J-P, group AHEFs. Automation of the Hepascore and validation as a biochemical index of liver fibrosis in patients with chronic hepatitis C from the ANRS HC EP 23 Fibrostar cohort. *Clinica Chimica Acta* 2010;411:86-91.
56. Guechot J, Laudat A, Loria A, Serfaty L, Poupon R, Giboudeau J. Diagnostic accuracy of hyaluronan and type III procollagen amino-terminal peptide serum assays as markers of liver fibrosis in chronic viral hepatitis C evaluated by ROC curve analysis. *Clinical Chemistry* 1996;42:558-563.
57. Guzelbulut F, Cetinkaya ZA, Sezikli M, Yasar B, Ozkara S, Ovunc AOK. AST-platelet ratio index, Forns index and FIB-4 in the prediction of significant fibrosis and cirrhosis in patients with chronic hepatitis C. *Turkish Journal of Gastroenterology* 2011;22:279-285.
58. Halfon P, Bourliere M, Deydier R, Botta-Fridlund D, Renou C, Tran A, Portal I, et al. Independent prospective multicenter validation of biochemical markers (fibrotest-actitest) for the prediction of liver fibrosis and activity in patients with chronic hepatitis C: The fibropaca study. *American Journal of Gastroenterology* 2006;101:547-555.
59. Halfon P, Bourliere M, Penaranda G, Deydier R, Renou C, Botta-Fridlund D, Tran A, et al. Accuracy of hyaluronic acid level for predicting liver fibrosis stages in patients with hepatitis C virus. *Comparative Hepatology* 2005;4.

60. Halfon P, Bacq Y, De Muret A, Penaranda G, Bourliere M, Ouzan D, Tran A, et al. Comparison of test performance profile for blood tests of liver fibrosis in chronic hepatitis C. *Journal of Hepatology* 2007;46:395-402.
61. Harada N, Soejima Y, Taketomi A, Yoshizumi T, Ikegami T, Yamashita Y-i, Itoh S, et al. Assessment of graft fibrosis by transient elastography in patients with recurrent hepatitis C after living donor liver transplantation. *Transplantation* 2008;85:69-74.
62. Hsieh YY, Tung SY, Lee K, Wu CS, Wei KL, Shen CH, Chang TS, et al. Routine blood tests to predict liver fibrosis in chronic hepatitis C. *World Journal of Gastroenterology* 2012;18:746-753.
63. Iacobellis A, Fusilli S, Mangia A, Clemente R, Festa V, Giacobbe A, Facciorusso D, et al. Ultrasonographic and biochemical parameters in the non-invasive evaluation of liver fibrosis in hepatitis C virus chronic hepatitis. *Alimentary Pharmacology and Therapeutics* 2005;22:769-774.
64. Imbert-Bismut F, Ratziu V, Pieroni L, Charlotte F, Benhamou Y, Poinard T, Group M. Biochemical markers of liver fibrosis in patients with hepatitis C virus infection: a prospective study. *Lancet* 2001;357:1069-1075.
65. Imperiale TF, Said AT, Cummings OW, Born LJ. Need for validation of clinical decision aids: Use of the AST/ALT ratio in predicting cirrhosis in chronic hepatitis C. *American Journal of Gastroenterology* 2000;95:2328-2332.
66. Islam S, Antonsson L, Westin J, Lagging M. Cirrhosis in hepatitis C virus-infected patients can be excluded using an index of standard biochemical serum markers. *Scandinavian Journal of Gastroenterology* 2005;40:867-872.
67. Iushchuk ND, Znoiko OO, Safiullina NK, Dudina KR, Kelli EI, Klimova EA, Kashirin VI, et al. [Diagnostic significance of type IV collagen and hyaluronic acid in

the serum of patients with chronic hepatitis C for staging hepatic fibrosis].  
*Terapevticheskii Arkhiv* 2005;77:50-55.

68. Ben Jazia E, Kaabia N, Benabdelkader A, Khalifa M, Harrabi I, Braham A, Bahri F, et al. Noninvasive fibrosis markers for the prediction of significant fibrosis in patients with chronic hepatitis C virus infection in Tunisia. *Infectious Diseases in Clinical Practice* 2009;17:385-387.

69. Kalantari H, Hoseini H, Babak A, Yaran M. Validation of hepascore as a predictor of liver fibrosis in patients with chronic hepatitis C infection. *Hepatitis Research and Treatment* 2011;2011.

70. Kamphues C, Lotz K, Rocken C, Berg T, Eurich D, Pratschke J, Neuhaus P, et al. Chances and limitations of non-invasive tests in the assessment of liver fibrosis in liver transplant patients. *Clinical Transplantation* 2010;24:652-659.

71. Kandemir O, Polat G, Saracoglu G, Tasdelen B. The predictive role of AST level, prothrombin time, and platelet count in the detection of liver fibrosis in patients with chronic hepatitis C. *Turkish Journal of Medical Sciences* 2009;39:857-862.

72. Kelleher TB, Mehta SH, Bhaskar R, Sulkowski M, Astemborski J, Thomas DL, Moore RE, et al. Prediction of hepatic fibrosis in HIV/HCV co-infected patients using serum fibrosis markers: The SHASTA index. *Journal of Hepatology* 2005;43:78-84.

73. Khan DA, Fatima Tuz Z, Khan FA, Mubarak A. Evaluation of diagnostic accuracy of APRI for prediction of fibrosis in hepatitis C patients. *Journal of Ayub Medical College, Abbottabad : JAMC* 2008;20:122-126.

74. Kim SU, Jang HW, Cheong JY, Kim JK, Lee MH, Kim DJ, Yang JM, et al. The usefulness of liver stiffness measurement using FibroScan in chronic hepatitis C

in South Korea: a multicenter, prospective study. *Journal of Gastroenterology & Hepatology* 2011;26:171-178.

75. Koda M, Matunaga Y, Kawakami M, Kishimoto Y, Suou T, Murawaki Y. FibroIndex, a practical index for predicting significant fibrosis in patients with chronic hepatitis C. *Hepatology* 2007;45:297-306.

76. Koizumi Y, Hirooka M, Kisaka Y, Konishi I, Abe M, Murakami H, Matsuura B, et al. Liver fibrosis in patients with chronic hepatitis C: Noninvasive diagnosis by means of real-time tissue elastography - Establishment of the method for measurement. *Radiology* 2011;258:610-617.

77. Lackner C, Struber G, Liegl B, Leibl S, Ofner P, Bankuti C, Bauer B, et al. Comparison and validation of simple noninvasive tests for prediction of fibrosis in chronic hepatitis C. *Hepatology* 2005;41:1376-1382.

78. Ladero JM, Delkader J, Ortega L, Fernandez C, Devesa MJ, Lopez-Alonso G, Mayol J, et al. Non-invasive evaluation of the fibrosis stage in chronic hepatitis C: A comparative analysis of nine scoring methods. *Scandinavian Journal of Gastroenterology* 2010;45:51-59.

79. Lee VS, Miller FH, Omary RA, Wang Y, Ganger DR, Wang E, Rao S, et al. Magnetic resonance elastography and biomarkers to assess fibrosis from recurrent hepatitis C in liver transplant recipients. *Transplantation* 2011;92:581-586.

80. Leroy V, Monier F, Bottari S, Trocme C, Sturm N, Hilleret M-N, Morel F, et al. Circulating matrix metalloproteinases 1, 2, 9 and their inhibitors TIMP-1 and TIMP-2 as serum markers of liver fibrosis in patients with chronic hepatitis C: comparison with PIIINP and hyaluronic acid. *American Journal of Gastroenterology* 2004;99:271-279.

81. Leroy V, Hilleret M-N, Sturm N, Trocme C, Renversez J-C, Faure P, Morel F, et al. Prospective comparison of six non-invasive scores for the diagnosis of liver fibrosis in chronic hepatitis C. *Journal of Hepatology* 2007;46:775-782.
82. Leroy V, Sturm N, Guechot J, Zafrani ES, Paris A, Bosson JL, Zarski JP. Steato-hepatitis has a strong impact on liver stiffness measured by transient elastography in chronic hepatitis C patients. *Journal of Hepatology* 2011;54:S135.
83. Lewin M, Poujol-Robert A, Boelle P-Y, Wendum D, Lasnier E, Viallon M, Guechot J, et al. Diffusion-weighted magnetic resonance imaging for the assessment of fibrosis in chronic hepatitis C. *Hepatology* 2007;46:658-665.
84. Lieber CS, Weiss DG, Morgan TR, Paronetto F. Aspartate aminotransferase to platelet ratio index in patients with alcoholic liver fibrosis. *American Journal of Gastroenterology* 2006;101:1500-1508.
85. Liu C-H, Lin J-W, Tsai F-C, Yang P-M, Lai M-Y, Chen J-H, Kao J-H, et al. Noninvasive tests for the prediction of significant hepatic fibrosis in hepatitis C virus carriers with persistently normal alanine aminotransferases. *Liver International* 2006;26:1087-1094.
86. Liu CH, Liang CC, Huang KW, Liu CJ, Chen SI, Lin JW, Hung PH, et al. Transient elastography to assess hepatic fibrosis in hemodialysis chronic hepatitis C patients. *Clinical Journal of the American Society of Nephrology* 2011;6:1057-1064.
87. Liu CH, Hsu SJ, Lin JW, Hwang JJ, Liu CJ, Yang PM, Lai MY, et al. Noninvasive diagnosis of hepatic fibrosis in patients with chronic hepatitis c by splenic Doppler impedance index. *Clinical Gastroenterology and Hepatology* 2007;5:1199-1206.
88. Loko MA, Castera L, Dabis F, Le Bail B, Winnock M, Coureau G, Bioulac-Sage P, et al. Validation and comparison of simple noninvasive indexes for predicting

liver fibrosis in HIV-HCV-coinfected patients: ANRS CO3 aquitaine cohort. *American Journal of Gastroenterology* 2008;103:1973-1980.

89. Lupsor M, Badea R, Stefanescu H, Grigorescu M, Sparchez Z, Serban A, Branda H, et al. Analysis of Histopathological Changes that Influence Liver Stiffness in Chronic Hepatitis C. Results from a Cohort of 324 Patients. *Journal of Gastrointestinal and Liver Diseases* 2008;17:155-163.

90. Lupsor M, Badea R, Stefanescu H, Sparchez Z, Branda H, Serban A, Maniu A. Performance of a new elastographic method (ARFI technology) compared to unidimensional transient elastography in the noninvasive assessment of chronic hepatitis C. Preliminary results. *Journal of gastrointestinal and liver diseases : JGLD* 2009;18:303-310.

91. Macias J, Giron-Gonzalez JA, Gonzalez-Serrano M, Merino D, Cano P, Mira JA, Arizcorreta-Yarza A, et al. Prediction of liver fibrosis in human immunodeficiency virus/hepatitis C virus coinfected patients by simple non-invasive indexes. *Gut* 2006;55:409-414.

92. Macias J, Mira J, Gilabert I, Neukam K, Roldan C, Vilorio M, Moro A, et al. Combined use of aspartate aminotransferase, platelet count and matrix metalloproteinase 2 measurements to predict liver fibrosis in HIV/hepatitis C virus-coinfected patients. *HIV Medicine* 2011;12:14-21.

93. Martinez SM, Fernandez-Varo G, Gonzalez P, Sampson E, Bruguera M, Navasa M, Jimenez W, et al. Assessment of liver fibrosis before and after antiviral therapy by different serum marker panels in patients with chronic hepatitis C. *Alimentary Pharmacology and Therapeutics* 2011;33:138-148.

94. Morikawa H, Fukuda K, Kobayashi S, Fujii H, Iwai S, Enomoto M, Tamori A, et al. Real-time tissue elastography as a tool for the noninvasive assessment of liver

stiffness in patients with chronic hepatitis C. *Journal of Gastroenterology* 2011;46:350-358.

95. Murawaki Y, Koda M, Okamoto K, Mimura K, Kawasaki H. Diagnostic value of serum type IV collagen test in comparison with platelet count for predicting the fibrotic stage in patients with chronic hepatitis C. *Journal of Gastroenterology and Hepatology* 2001;16:777-781.

96. Myers RP, Ratziu V, Imbert-Bismut F, Charlotte F, Poynard T, C MGGdEMslPLaV. Biochemical markers of liver fibrosis: a comparison with historical features in patients with chronic hepatitis C. *American Journal of Gastroenterology* 2002;97:2419-2425.

97. Nitta Y, Kawabe N, Hashimoto S, Harata M, Komura N, Kobayashi K, Arima Y, et al. Liver stiffness measured by transient elastography correlates with fibrosis area in liver biopsy in patients with chronic hepatitis C. *Hepatology Research* 2009;39:675-684.

98. Nojiri S. Noninvasive evaluation of hepatic fibrosis in HCV-infected patients using EOB-MR imaging. *Journal of Hepatology* 2010;52:S169-S170.

99. Nunes D, Fleming C, Offner G, O'Brien M, Tumilty S, Fix O, Heeren T, et al. HIV infection does not affect the performance of noninvasive markers of fibrosis for the diagnosis of hepatitis C virus-related liver disease. *Journal of Acquired Immune Deficiency Syndromes* 2005;40:538-544.

100. Obara N, Ueno Y, Fukushima K, Nakagome Y, Kakazu E, Kimura O, Wakui Y, et al. Transient elastography for measurement of liver stiffness measurement can detect early significant hepatic fibrosis in Japanese patients with viral and nonviral liver diseases. *Journal of Gastroenterology* 2008;43:720-728.

101. Oliveira AC, Santos VN, Salgado AL, Lanzoni VP, Nogueira MD, Martins JR, Nader HB, et al. Serum hyaluronic acid and the AST/ALT ratio in the diagnosis of advanced fibrosis in patients with non alcoholic liver disease and chronic hepatitis C. *Journal of Hepatology* 2005;42:250-250.
102. Orlacchio A, Bolacchi F, Petrella MC, Pastorelli D, Bazzocchi G, Angelico M, Simonetti G. Liver contrast enhanced ultrasound perfusion imaging in the evaluation of chronic hepatitis C fibrosis: Preliminary results. *Ultrasound in Medicine and Biology* 2011;37:1-6.
103. Paggi S, Colli A, Fraquelli M, Vigano M, Del Poggio P, Facciotto C, Colombo M, et al. A non-invasive algorithm accurately predicts advanced fibrosis in hepatitis C: a comparison using histology with internal-external validation. *Journal of Hepatology* 2008;49:564-571.
104. Parise ER, Oliveira AC, Figueiredo-Mendes C, Lanzoni V, Martins J, Nader H, Ferraz ML. Noninvasive serum markers in the diagnosis of structural liver damage in chronic hepatitis C virus infection. *Liver International* 2006;26:1095-1099.
105. Park GJ, Lin BP, Ngu MC, Jones DB, Katelaris PH. Aspartate aminotransferase: alanine aminotransferase ratio in chronic hepatitis C infection: is it a useful predictor of cirrhosis? *Journal of Gastroenterology & Hepatology* 2000;15:386-390.
106. Parkes J, Guha IN, Roderick P, Harris S, Cross R, Manos MM, Irving W, et al. Enhanced Liver Fibrosis (ELF) test accurately identifies liver fibrosis in patients with chronic hepatitis C. *Journal of Viral Hepatitis* 2011;18:23-31.
107. Patel K, Benhamou Y, Yoshida EM, Kaita KD, Zeuzem S, Torbenson M, Pulkstenis E, et al. An independent and prospective comparison of two commercial fibrosis marker panels (HCV FibroSURE and FIBROSpect II) during albinterferon



alfa-2b combination therapy for chronic hepatitis C. *Journal of Viral Hepatitis* 2009;16:178-186.

108. Patel K, Friedrich-Rust M, Lurie Y, Grigorescu M, Stanciu C, Lee C-M, Schiff ER, et al. FibroSURE and FibroScan in relation to treatment response in chronic hepatitis C virus. *World Journal of Gastroenterology* 2011;17:4581-4589.

109. Pohl A, Behling C, Oliver D, Kilani M, Monson P, Hassanein T. Serum aminotransferase levels and platelet counts as predictors of degree of fibrosis in chronic hepatitis C virus infection. *American Journal of Gastroenterology* 2001;96:3142-3146.

110. Poynard T, De Ledinghen V, Zarski JP, Stanciu C, Munteanu M, Vergniol J, France J, et al. Relative performances of FibroTest, Fibroscan, and biopsy for the assessment of the stage of liver fibrosis in patients with chronic hepatitis C: A step toward the truth in the absence of a gold standard. *Journal of Hepatology* 2012;56:541-548.

111. Prati GM, D'Ambrosio R, Fraquelli M, Aghemo A, Rumi MG, Ronchi G, Paradis V, et al. The diagnostic accuracy of fibroscan for cirrhosis is influenced by liver morphometry in HCV patients with an SVR. *Hepatology* 2011;54:560A.

112. Qiu Y, Hoshida YJ, Kato N, Moriyama M, Otsuka M, Taniguchi H, Kawabe T, et al. A simple combination of serum type IV collagen and prothrombin time to diagnose cirrhosis in patients with chronic active hepatitis C. *Hepatology Research* 2004;30:214-220.

113. Reedy DW, Loo AT, Levine RA. AST/ALT ratio  $\leq 1$  is not diagnostic of cirrhosis in patients with chronic hepatitis C. *Digestive Diseases and Sciences* 1998;43:2156-2159.

114. Ronot M, Asselah T, Paradis V, Michoux N, Dorvillius M, Baron G, Marcellin P, et al. Liver fibrosis in chronic hepatitis C virus infection: Differentiating minimal from intermediate fibrosis with perfusion CT. *Radiology* 2010;256:135-142.
115. Rossi E, Adams L, Prins A, Bulsara M, De Boer B, Garas G, MacQuillan G, et al. Validation of the FibroTest biochemical markers score in assessing liver fibrosis in hepatitis C patients. *Clinical Chemistry* 2003;49:450-454.
116. Rossini A, Cabassa P, Gatti E, Contessi GB, Morone M, Maroldi R. Assessment of liver fibrosis by acoustic radiation force elastography in healthy subjects and patients with chronic hepatitis C. *Hepatology* 2010;52:1234A.
117. Said Y, Salem M, Mouelhi L, Mekki H, Houissa F, Ben Rejeb M, Moussa A, et al. Correlation between liver biopsy and fibrotest in the evaluation of hepatic fibrosis in patients with chronic hepatitis C. *Tunisie Medicale* 2010;88:573-578.
118. Saitou Y, Shiraki K, Yamanaka Y, Yamaguchi Y, Kawakita T, Yamamoto N, Sugimoto K, et al. Noninvasive estimation of liver fibrosis and response to interferon therapy by a serum fibrogenesis marker, YKL-40, in patients with HCV-associated liver disease. *World Journal of Gastroenterology* 2005;11:476-481.
119. Sanvisens A, Serra I, Tural C, Tor J, Ojanguren I, Barluenga E, Rey-Joly C, et al. Hyaluronic acid, transforming growth factor-beta1 and hepatic fibrosis in patients with chronic hepatitis C virus and human immunodeficiency virus co-infection. *Journal of Viral Hepatitis* 2009;16:513-518.
120. Schiavon LL, Filho RJC, Narciso JL, Sampaio JP, Lanzoni VP, Ferraz MLG, Silva AEB. Expanding the applicability of noninvasive fibrosis markers in HIV/HCV co-infected patients. *Hepatology* 2007;45:257-258.
121. Schiavon LL, Narciso-Schiavon JL, Carvalho Filho RJ, Sampaio JP, Medina-Pestana JO, Lanzoni VP, Silva AEB, et al. Serum levels of YKL-40 and hyaluronic

acid as noninvasive markers of liver fibrosis in haemodialysis patients with chronic hepatitis C virus infection. *Journal of Viral Hepatitis* 2008;15:666-674.

122. Schneider ARJ, Teuber G, Paul K, Nikodem A, Duesterhoeft M, Caspary WF, Stein J. Patient age is a strong independent predictor of <sup>13</sup>C-aminopyrine breath test results: A comparative study with histology, duplex-Doppler and a laboratory index in patients with chronic hepatitis C virus infection. *Clinical and Experimental Pharmacology and Physiology* 2006;33:300-304.

123. Schneider ARJ, Teuber G, Kriener S, Caspary WF. Noninvasive assessment of liver steatosis, fibrosis and inflammation in chronic hepatitis C virus infection. *Liver International* 2005;25:1150-1155.

124. Sebastiani G, Halfon P, Castera L, Mangia A, Di Marco V, Pirisi M, Voiculescu M, et al. Comparison of three algorithms of non-invasive markers of fibrosis in chronic hepatitis C. *Alimentary Pharmacology and Therapeutics* 2012;35:92-104.

125. Sebastiani G, Halfon P, Castera L, Pol S, Thomas DL, Mangia A, Di Marco V, et al. SAFE biopsy: A validated method for large-scale staging of liver fibrosis in chronic hepatitis C. *Hepatology* 2009;49:1821-1827.

126. Sebastiani G, Vario A, Guido M, Noventa F, Plebani M, Pistis R, Ferrari A, et al. Stepwise combination algorithms of non-invasive markers to diagnose significant fibrosis in chronic hepatitis C. *Journal of Hepatology* 2006;44:686-693.

127. Sebastian G, Vario A, Guido M, Alberti A. Performance of noninvasive markers for liver fibrosis is reduced in chronic hepatitis C with normal transaminases. *Journal of Viral Hepatitis* 2008;15:212-218.

128. Sene D, Limal N, Messous D, Ghillani-Dalbin P, Charlotte F, Thiolliere JM, Piette JC, et al. Biological markers of liver fibrosis and activity as non-invasive

alternatives to liver biopsy in patients with chronic hepatitis C and associated mixed cryoglobulinemia vasculitis. *Clinical Biochemistry* 2006;39:715-721.

129. Sharabash NM, Jensen DM, Cao D, Reau N, Mohanty SR, Satoskar RS, Reddy KG, et al. Fibrospect II (FS II) score overestimates the degree of fibrosis in chronic hepatitis C (CHC) patients with significant renal dysfunction. *Hepatology* 2009;50:1062A.

130. Shastry L, Wilson T, Lascher S, Nord JA. The utility of aspartate aminotransferase/platelet ratio index in HIV/hepatitis C-co-infected patients. *Aids* 2007;21:2541-2543.

131. Sheth SG, Flamm SL, Gordon FD, Chopra S. AST/ALT ratio predicts cirrhosis in patients with chronic hepatitis C virus infection. *American Journal of Gastroenterology* 1998;93:44-48.

132. Singal AG, Thomassen LV, Gretch DR, Shuhart MC. Use of the AST to platelet ratio index in HCV/HIV co-infected patients. *Alimentary Pharmacology and Therapeutics* 2011;33:566-577.

133. Sirli R, Sporea I, Bota S, Popescu A, Cornianu M. A comparative study of non-invasive methods for fibrosis assessment in chronic HCV infection. *Hepatitis Monthly* 2010;10:88-94.

134. Snyder N, Nguyen A, Gajula L, Soloway R, Xiao SY, Lau DTY, Petersen J. The APRI may be enhanced by the use of the FIBROSpect II in the estimation of fibrosis in chronic hepatitis C. *Clinica Chimica Acta* 2007;381:119-123.

135. Snyder N, Gajula L, Xiao S-Y, Grady J, Luxon B, Lau DTY, Soloway R, et al. APRI: an easy and validated predictor of hepatic fibrosis in chronic hepatitis C. *Journal of Clinical Gastroenterology* 2006;40:535-542.

136. Sohn JH, Kim TY, Jun DW, Eun CS, Jeon YC, Han DS. Platelet count/spleen diameter ratio is more accurate for prediction of significant and extensive fibrosis than AST-to-platelet ratio index (APRI) in patients with chronic hepatitis C. *Journal of Hepatology* 2010;52:S173.
137. Sporea I, Sirli R, Deleanu A, Tudora A, Curescu M, Cornianu M, Lazar D. Comparison of the liver stiffness measurement by transient elastography with the liver biopsy. *World journal of gastroenterology : WJG* 2008;14:6513-6517.
138. Sporea I, Sirli R, Deleanu A, Tudora A, Popescu A, Curescu M, Bota S. Liver stiffness measurements in patients with HBV vs HCV chronic hepatitis: A comparative study. *World Journal of Gastroenterology* 2010;16:4832-4837.
139. Sporea I, Sirli R, Popescu A, Badea R, Lupsor M, Focsa M, Danila M, et al. Is it better to use together transient elastography (TE) and acoustic radiation force impulse elastography (ARFI) for fibrosis evaluation in patients with chronic HCV hepatitis? *Gastroenterology* 2011;1):S968.
140. Sporea I, Sirli R, Bota S, Tanaka H, Iijima H, Badea RI, Lupsor M, et al. Is ARFI elastography useful for fibrosis evaluation in patients with chronic HCV hepatitis in our clinical practice? - A multicenter international study. *Hepatology* 2011;54:559A-560A.
141. Sterling RK, Lissen E, Clumeck N, Sola R, Correa MC, Montaner J, Sulkowski M, et al. Development of a simple noninvasive index to predict significant fibrosis in patients with HIV/HCV coinfection. *Hepatology* 2006;43:1317-1325.
142. Stibbe KJM, Verveer C, Francke J, Hansen BE, Zondervan PE, Kuipers EJ, De Kneegt RJ, et al. Comparison of non-invasive assessment to diagnose liver fibrosis in chronic hepatitis B and C patients. *Scandinavian Journal of Gastroenterology* 2011;46:962-972.

143. Sud A, Hui JM, Farrell GC, Bandara P, Kench JG, Fung C, Lin R, et al. Improved Prediction of Fibrosis in Chronic Hepatitis C Using Measures of Insulin Resistance in a Probability Index. *Hepatology* 2004;39:1239-1247.
144. Testa R, Testa E, Giannini E, Borro P, Milazzo S, Isola L, Ceppa P, et al. Noninvasive ratio indexes to evaluate fibrosis staging in chronic hepatitis C: Role of platelet count/spleen diameter ratio index. *Journal of Internal Medicine* 2006;260:142-150.
145. Thompson AJ, Elliott L, Tillmann HL, McHutchison J, Patel K. A large independent, single center comparison of two commercial fibrosis marker panels (HCV FibroSure and HepaScore) for moderate-to-advanced stage fibrosis in CHC patients. *Gastroenterology* 2009;1):A834.
146. Thompson A, Elliott L, Tillmann H, McHutchison J, Patel K. Paired biopsy comparison of two liver fibrosis marker panels (HCV fibrotest, hepascore) in following histological response to antiviral therapy for chronic hepatitis C (CHC). *Journal of Hepatology* 2009;50:S159.
147. Thompson AJ, Clark PJ, Tillmann HL, Torbenson M, Pulkstenis E, Subramanian M, McHutchison J, et al. Independent validation of the safe biopsy algorithm: Analysis of the achieve cohorts. *Gastroenterology* 2010;1):S780.
148. Toniutto P, Fabris C, Bitetto D, Falletti E, Avellini C, Rossi E, Smirne C, et al. Role of AST to platelet ratio index in the detection of liver fibrosis in patients with recurrent hepatitis C after liver transplantation. *Journal of Gastroenterology and Hepatology* 2007;22:1904-1908.
149. Trang T, Petersen JR, Snyder N. Non-invasive markers of hepatic fibrosis in patients co-infected with HCV and HIV: Comparison of the APRI and FIB-4 index. *Clinica Chimica Acta* 2008;397:51-54.

150. Trifan A, Cojocariu C, Sfarti C, Stanciu C. Prospective clinical trial on the accuracy of non-invasive tests to predict liver fibrosis in chronic HCV patients. *Hepatology* 2009;50:1074A-1075A.
151. Trocme C, Leroy V, Sturm N, Hilleret MN, Bottari S, Morel F, Zarski JP. Longitudinal evaluation of a fibrosis index combining MMP-1 and PIIINP compared with MMP-9, TIMP-1 and hyaluronic acid in patients with chronic hepatitis C treated by interferon-alpha and ribavirin. *Journal of Viral Hepatitis* 2006;13:643-651.
152. Vallet-Pichard A, Mallet V, Nalpas B, Verkarre V, Nalpas A, Dhalluin-Venier V, Fontaine H, et al. FIB-4: An inexpensive and accurate marker of fibrosis in HCV infection. Comparison with liver biopsy and FibroTest. *Hepatology* 2007;46:32-36.
153. Tural C, Tor J, Sanvisens A, Perez-Alvarez N, Martinez E, Ojanguren I, Garcia-Samaniego J, et al. Accuracy of Simple Biochemical Tests in Identifying Liver Fibrosis in Patients Co-Infected With Human Immunodeficiency Virus and Hepatitis C Virus. *Clinical Gastroenterology and Hepatology* 2009;7:339-345.
154. Valva P, Casciato P, Diaz Carrasco JM, Gadano A, Galdame O, Galoppo MC, Mullen E, et al. The role of serum biomarkers in predicting fibrosis progression in pediatric and adult hepatitis C virus chronic infection. *PLoS ONE [Electronic Resource]* 2011;6:e23218.
155. Varaut A, Fontaine H, Serpaggi J, Verkarre V, Vallet-Pichard A, Nalpas B, Imbertbismuth F, et al. Diagnostic accuracy of the fibrotest in hemodialysis and renal transplant patients with chronic hepatitis C virus. *Transplantation* 2005;80:1550-1555.
156. Wai CT, Greenson JK, Fontana RJ, Kalbfleisch JD, Marrero JA, Conjeevaram HS, Lok ASF. A simple noninvasive index can predict both significant fibrosis and cirrhosis in patients with chronic hepatitis C. *Hepatology* 2003;38:518-526.

157. Westin J, Ydreborg M, Islam S, Alsio A, Dhillon AP, Pawlotsky JM, Zeuzem S, et al. A non-invasive fibrosis score predicts treatment outcome in chronic hepatitis C virus infection. *Scandinavian Journal of Gastroenterology* 2008;43:73-80.
158. Wilson LE, Torbenson M, Astemborski J, Faruki H, Spoler C, Rai R, Mehta S, et al. Progression of liver fibrosis among injection drug users with chronic hepatitis C. *Hepatology* 2006;43:788-795.
159. Wong VS, Hughes V, Trull A, Wight DG, Petrik J, Alexander GJ. Serum hyaluronic acid is a useful marker of liver fibrosis in chronic hepatitis C virus infection. *Journal of Viral Hepatitis* 1998;5:187-192.
160. Zaman A, Rosen H, Oh E, Ingram K, Smith K. Prospective assessment of FIBROSpect II hepatic to detect fibrosis in patients with chronic Hepatitis C. *American Journal of Gastroenterology* 2004;99:S79-S79.
161. Zarski JP, Sturm N, Guechot J, Paris A, Zafrani ES, Asselah T, Boisson RC, et al. Comparison of nine blood tests and transient elastography for liver fibrosis in chronic hepatitis C: The ANRS HCEP-23 study. *Journal of Hepatology* 2012;56:55-62.
162. Ziol M, Handra-Luca A, Kettaneh A, Christidis C, Mal F, Kazemi F, de Ledinghen V, et al. Noninvasive assessment of liver fibrosis by measurement of stiffness in patients with chronic hepatitis C. *Hepatology* 2005;41:48-54.
163. Stevenson M, Lloyd-Jones M, Morgan MY, Wong R. Non-invasive diagnostic assessment tools for the detection of liver fibrosis in patients with suspected alcohol-related liver disease: a systematic review and economic evaluation. *Health technology assessment (Winchester, England)* 2012;16:1-174.
